# Supplementary material
Source: Preprints.org preprint supplement (doi:10.20944/preprints202108.0450.v1)
Supplement: Supplementary file 1 [file supplementary]

**Supplementary table 1**. Homologous and heterologous post vaccination neutralising antibody titres (21 or 7 days post vaccination) and clinical observations at 8 days post challenge in cattle vaccinated with a O-3039 + O1 Manisa combination vaccine (Combo) or O-3039 monovalent vaccine and an unvaccinated control group (UVC). Titres are expressed as log10 values at the time of challenge. Combo-21 and O-3039-21 groups were challenged on 21 dpv while Combo-7 and O-3039-7 groups were challenged on 7 dpv. All sera were tested against O1 Manisa, O-3039 and O-ALG virus. Titres ≥1.20 log10 are considered positive and are highlighted in bold. FMD Lesions: + - protected; LF – Left forelimb; BF – Both forelimbs; BH – Both hindlimbs

| Groups | Animal ID | O-3039 | O1 Manisa | O-ALG | Clinical Status |
| --- | --- | --- | --- | --- | --- |
| Combo-21 | 9658 | **2.40** | **2.10** | **2.40** | + |
| 9659 | **2.40** | **2.10** | **2.40** | + |
| 9660 | **2.40** | **1.95** | **2.40** | + |
| 9661 | **2.25** | **2.10** | **2.40** | + |
| 9662 | **3.00** | **2.40** | **2.10** | + |
| O3039-21 | 9663 | **3.00** | **1.95** | **2.85** | + |
| 9664 | **3.00** | **2.10** | **2.10** | + |
| 9665 | **2.70** | **2.25** | **2.40** | + |
| 9666 | **2.40** | **1.95** | **2.40** | + |
| 9667 | **2.70** | **1.80** | **2.10** | + |
| Combo-7 | 9668 | **2.25** | 0.90 | **1.35** | + |
| 9669 | 1.05 | 0.75 | 0.60 | + |
| 9670 | **2.40** | **1.50** | **2.10** | + |
| 9671 | **1.95** | **1.50** | **1.35** | + |
| 9672 | **2.10** | **1.80** | **1.65** | Not protected; BF |
| O3039-7 | 9673 | **2.10** | **1.35** | **2.10** | + |
| 9674 | **2.10** | **1.80** | **1.35** | Not protected; BH |
| 9675 | **1.95** | 0.75 | **1.80** | + |
| 9676 | **2.10** | 1.05 | **2.40** | + |
| 9677 | **1.80** | **1.50** | 1.05 | Not protected; BF, RH |
| UVC | 9678 | 0.30 | 0.30 | 0.30 | Generalised; LF, BH |
| 9679 | 0.30 | 0.30 | 0.45 | Generalised; BF, BH |
| 9680 | 0.30 | 0.30 | 0.30 | Generalised; BF, BH |

**LVZ194 Type O vaccines linear and linear mixed model analysis using R-Statistics**

R version 4.0.2 (2020-06-22) -- "Taking Off Again"

Copyright (C) 2020 The R Foundation for Statistical Computing

Platform: x86_64-w64-mingw32/x64 (64-bit)

R is free software and comes with ABSOLUTELY NO WARRANTY.

You are welcome to redistribute it under certain conditions.

Type 'license()' or 'licence()' for distribution details.

Natural language support but running in an English locale

R is a collaborative project with many contributors.

Type 'contributors()' for more information and

'citation()' on how to cite R or R packages in publications.

Type 'demo()' for some demos, 'help()' for on-line help, or

'help.start()' for an HTML browser interface to help.

Type 'q()' to quit R.

[Workspace loaded from C:/Data/Type O/.RData]

####################################################################################

> setwd("C:/Data/Type O/New analysis")

> getwd()

[1] "C:/Data/Type O/New analysis"

> library(lme4)

Loading required package: Matrix

**###### protection against challenge #########**

**###### vaccinated vs control against challenge #########**

> pr<-matrix(c(3,17,3,0),byrow=T,ncol=2,dimnames=list(c("vaccinated","control"),c("non-protected","Protected")))

> pr

|  | non-protected | Protected |
| --- | --- | --- |
| vaccinated | 3 | 17 |
| control | 3 | 0 |

> fisher.test(pr)

Fisher's Exact Test for Count Data

data: pr

p-value = 0.01129

alternative hypothesis: true odds ratio is not equal to 1

95 percent confidence interval: 0.0000000 0.6866581

sample estimates: odds ratio = 0

**###### day post vaccination against challenge #########**

> table(prot1,day)

|  | day | |
| --- | --- | --- |
| prot1 | 21 | 7 |
| 0 | 0 | 3 |
| 1 | 10 | 7 |

> fisher.test(table(prot1,day))

Fisher's Exact Test for Count Data

data: table(prot1, day)

p-value = 0.2105

alternative hypothesis: true odds ratio is not equal to 1

95 percent confidence interval: 0.000000 2.255229

sample estimates: odds ratio = 0

**###### type of vaccine against challenge #########**

> table(prot1,vaccine)

|  | Vaccine | |
| --- | --- | --- |
| prot1 | Combo | O3039 |
| 0 | 1 | 2 |
| 1 | 9 | 8 |

> fisher.test(table(prot1,vaccine))

Fisher's Exact Test for Count Data

data: table(prot1, vaccine)

p-value = 1

alternative hypothesis: true odds ratio is not equal to 1

95 percent confidence interval: 0.0067986 10.5137419

sample estimates: odds ratio = 0.4624944

**###### vaccine groups against challenge #########**

> protection.vac<-matrix(c(5,0,5,0,4,1,3,2), byrow=T, ncol=2, dimnames=list(c("Combo-21","O3039-21","Combo-7","O3039-7"), c("Protected","Not protected")))

> protection.vac

|  | Protected | Not protected |
| --- | --- | --- |
| Combo-21 | 5 | 0 |
| O3039-21 | 5 | 0 |
| Combo-7 | 4 | 1 |
| O3039-7 | 3 | 2 |

> fisher.test(protection.vac)

Fisher's Exact Test for Count Data

data: protection.vac

p-value = 0.5614

alternative hypothesis: two.sided

**###### vaccine groups against challenge with controls #########**

> protection.uvc<-matrix(c(5,0,5,0,4,1,3,2,0,3),byrow=T,ncol=2,dimnames=list(c("Combo-21","O3039-21","Combo-7","O3039-7","UVC"),c("Protected","Not protected")))

> protection.uvc

|  | Protected | Not protected |
| --- | --- | --- |
| Combo-21 | 5 | 0 |
| O3039-21 | 5 | 0 |
| Combo-7 | 4 | 1 |
| O3039-7 | 3 | 2 |
| UVC | 0 | 3 |

> fisher.test(protection.uvc) #only after inclusion of controls significant

Fisher's Exact Test for Count Data

data: protection.uvc

p-value = 0.01359

alternative hypothesis: two.sided

**#############Antibody titres and protective response**

> data<-read.csv('LVZ194.csv',sep=';')

> data$AbOManisa<-ifelse(data$AbOManisa=='<0.3',0.15,as.numeric(as.character(data$AbOManisa)))

> data$AbO3039<-ifelse(data$AbO3039=='<0.3',0.15,as.numeric(as.character(data$AbO3039)))

> data$AbOAlg<-ifelse(data$AbOAlg=='<0.3',0.15,as.numeric(as.character(data$AbOAlg)))

> data$day<-ifelse(is.na(data$day),'control',data$day)

> data$day<-factor(data$day)

> data$group<-factor(data$group)

> summary(data)

> attach(data)

> table(paste(day,vaccine),group)

**########## O Manisa serology between groups 21 day and 7 day**

> t.test(data[group==1|group==3,]$AbOManisa~factor(data[group==1|group==3,]$group),var.equal=T)

Two Sample t-test

data: data[group == 1 | group == 3, ]$AbOManisa by factor(data[group == 1 | group == 3, ]$group)

t = 3.9598, df = 8, p-value = 0.004178

alternative hypothesis: true difference in means is not equal to 0

95 percent confidence interval:

0.3508227 1.3291773

sample estimates:

mean in group 1 mean in group 3

2.13 1.29

> t.test(data[group==1|group==3,]$AbOAlg~factor(data[group==1|group==3,]$group),var.equal=T)

Two Sample t-test

data: data[group == 1 | group == 3, ]$AbOAlg by factor(data[group == 1 | group == 3, ]$group)

t = 3.692, df = 8, p-value = 0.006112

alternative hypothesis: true difference in means is not equal to 0

95 percent confidence interval:

0.3491341 1.5108659

sample estimates:

mean in group 1 mean in group 3

2.34 1.41

**########## O 3039 serology between groups 21 day and 7 day**

> t.test(data[group==2|group==4,]$AbO3039~factor(data[group==2|group==4,]$group),var.equal=T)

Two Sample t-test

data: data[group == 2 | group == 4, ]$AbO3039 by factor(data[group == 2 | group == 4, ]$group)

t = 5.8926, df = 8, p-value = 0.0003648

alternative hypothesis: true difference in means is not equal to 0

95 percent confidence interval:

0.4564936 1.0435064

sample estimates:

mean in group 2 mean in group 4

2.76 2.01

> t.test(data[group==2|group==4,]$AbOAlg~factor(data[group==2|group==4,]$group),var.equal=T)

Two Sample t-test

data: data[group == 2 | group == 4, ]$AbOAlg by factor(data[group == 2 | group == 4, ]$group)

t = 2.245, df = 8, p-value = 0.055

alternative hypothesis: true difference in means is not equal to 0

95 percent confidence interval:

-0.01712081 1.27712081

sample estimates:

mean in group 2 mean in group 4

2.37 1.74

**########## O Alg serology between groups 21 day and 7 day**

> t.test(data[group==1|group==2,]$AbOAlg~factor(data[group==1|group==2,]$group),var.equal=T)

Two Sample t-test

data: data[group == 1 | group == 2, ]$AbOAlg by factor(data[group == 1 | group == 2, ]$group)

t = -0.2, df = 8, p-value = 0.8465

alternative hypothesis: true difference in means is not equal to 0

95 percent confidence interval:

-0.3759006 0.3159006

sample estimates:

mean in group 1 mean in group 2

2.34 2.37

> t.test(data[group==3|group==4,]$AbOAlg~factor(data[group==3|group==4,]$group),var.equal=T)

Two Sample t-test

data: data[group == 3 | group == 4, ]$AbOAlg by factor(data[group == 3 | group == 4, ]$group)

t = -0.95382, df = 8, p-value = 0.3681

alternative hypothesis: true difference in means is not equal to 0

95 percent confidence interval:

-1.1278241 0.4678241

sample estimates:

mean in group 3 mean in group 4

1.41 1.74

**##### Figure 2 ########**

> par(bty='n',mfrow=c(1,3))

> boxplot(data[group==1|group==2|group==3|group==4|group==5,]$AbO3039~data[group==1|group==2|group==3|group==4|group==5,]$group,ylim=c(0.5,3),ylab="O3039 VNT titre",xlab="Groups")

> boxplot(data[group==1|group==2|group==3|group==4|group==5,]$AbOManisa~data[group==1|group==2|group==3|group==4|group==5,]$group,ylim=c(0.5,3),ylab="O Manisa VNT titre",xlab="Groups")

> boxplot(data[group==1|group==2|group==3|group==4|group==5,]$AbOAlg~data[group==1|group==2|group==3|group==4|group==5,]$group,ylim=c(0.5,3),ylab="O Algeria VNT titre",xlab="Groups")


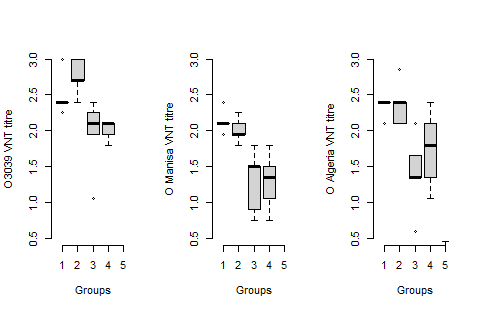


**### Statistics for Figure 2 #####**

**########## O Manisa serology between groups 21 day and 7 day (including control)**

> summary(aov(data[group!=2&group!=4,]$AbOManisa~data[group!=2&group!=4,]$group))

|  | Df | Sum Sq | Mean Sq | F value | Pr(>F) |  |
| --- | --- | --- | --- | --- | --- | --- |
| data[group != 2 & group != 4, ]$group | 2 | 6.352 | 3.176 | 35.29 | 2.94E-05 | *** |
| Residuals | 10 | 0.9 | 0.09 | --- |  |  |

Signif. codes: 0 ‘***’ 0.001 ‘**’ 0.01 ‘*’ 0.05 ‘.’ 0.1 ‘ ’ 1

> pairwise.t.test(data[group!=2&group!=4,]$AbOManisa,data[group!=2&group!=4,]$group,pool.sd=F)

Pairwise comparisons using t tests with non-pooled SD

data: data[group != 2 & group != 4, ]$AbOManisa and data[group != 2 & group != 4, ]$group

|  | 1 | 3 |
| --- | --- | --- |
| 3 | 0.015 | - |
| 5 | 4.60E-05 | 0.015 |

P value adjustment method: holm

> summary(aov(AbOManisa~group,data[group==1|group==3,]))

|  | Df | Sum Sq | Mean Sq | F value | Pr(>F) |  |
| --- | --- | --- | --- | --- | --- | --- |
| group | 1 | 1.764 | 1.764 | 15.68 | 0.00418 | ** |
| Residuals | 8 | 0.9 | 0.1125 | --- |  |  |

Signif. codes: 0 ‘***’ 0.001 ‘**’ 0.01 ‘*’ 0.05 ‘.’ 0.1 ‘ ’ 1

> pairwise.t.test(data[group==1|group==3,]$AbOManisa,data[group==1|group==3,]$group,pool.sd=T)

Pairwise comparisons using t tests with pooled SD

data: data[group == 1 | group == 3, ]$AbOManisa and data[group == 1 | group == 3, ]$group

|  | 1 |
| --- | --- |
| 3 | 0.0042 |

P value adjustment method: holm

**########## O 3039 serology between groups 21 day and 7 day (including control)**

> summary(aov(data[group!=1&group!=3,]$AbO3039~data[group!=1&group!=3,]$group))

|  | Df | Sum Sq | Mean Sq | F value | Pr(>F) |  |
| --- | --- | --- | --- | --- | --- | --- |
| data[group != 1 & group != 3, ]$group | 2 | 11.438 | 5.719 | 176.5 | 1.59E-08 | *** |
| Residuals | 10 | 0.324 | 0.032 | --- |  |  |

Signif. codes: 0 ‘***’ 0.001 ‘**’ 0.01 ‘*’ 0.05 ‘.’ 0.1 ‘ ’ 1

> pairwise.t.test(data[group!=1&group!=3,]$AbO3039,data[group!=1&group!=3,]$group,pool.sd=F)

Pairwise comparisons using t tests with non-pooled SD

data: data[group != 1 & group != 3, ]$AbO3039 and data[group != 1 & group != 3, ]$group

|  | 2 | 4 |
| --- | --- | --- |
| 4 | 0.00099 | - |
| 5 | 5.10E-05 | 2.70E-05 |

P value adjustment method: holm

> summary(aov(AbO3039~group,data[group==2|group==4,]))

|  | Df | Sum Sq | Mean Sq | F value | Pr(>F) |  |
| --- | --- | --- | --- | --- | --- | --- |
| group | 1 | 1.406 | 1.4062 | 34.72 | 0.000365 | *** |
| Residuals | 8 | 0.324 | 0.0405 | --- |  |  |

Signif. codes: 0 ‘***’ 0.001 ‘**’ 0.01 ‘*’ 0.05 ‘.’ 0.1 ‘ ’ 1

> pairwise.t.test(data[group==2|group==4,]$AbO3039,data[group==2|group==4,]$group)

Pairwise comparisons using t tests with pooled SD

data: data[group == 2 | group == 4, ]$AbO3039 and data[group == 2 | group == 4, ]$group

|  | 2 |
| --- | --- |
| 4 | 0.00036 |

P value adjustment method: holm

**########## O Alg serology between groups 21 day and 7 day (including control)**

> summary(aov(data[group!=2&group!=4,]$AbOAlg~data[group!=2&group!=4,]$group))

|  | Df | Sum Sq | Mean Sq | F value | Pr(>F) |  |
| --- | --- | --- | --- | --- | --- | --- |
| data[group != 2 & group != 4, ]$group | 2 | 7.529 | 3.765 | 29.32 | 6.56E-05 | *** |
| Residuals | 10 | 1.284 | 0.128 | --- |  |  |

Signif. codes: 0 ‘***’ 0.001 ‘**’ 0.01 ‘*’ 0.05 ‘.’ 0.1 ‘ ’ 1

> pairwise.t.test(data[group!=2&group!=4,]$AbOAlg,data[group!=2&group!=4,]$group,pool.sd=F)

Pairwise comparisons using t tests with non-pooled SD

data: data[group != 2 & group != 4, ]$AbOAlg and data[group != 2 & group != 4, ]$group

|  | 1 | 3 |
| --- | --- | --- |
| 3 | 0.022 | - |
| 5 | 9.70E-07 | 0.022 |

P value adjustment method: holm

> summary(aov(AbOAlg~group,data[group==1|group==3,]))

|  | Df | Sum Sq | Mean Sq | F value | Pr(>F) |  |
| --- | --- | --- | --- | --- | --- | --- |
| group | 1 | 2.162 | 2.1622 | 13.63 | 0.00611 | ** |
| Residuals | 8 | 1.269 | 0.1586 | --- |  |  |

Signif. codes: 0 ‘***’ 0.001 ‘**’ 0.01 ‘*’ 0.05 ‘.’ 0.1 ‘ ’ 1

> pairwise.t.test(data[group==1|group==3,]$AbOAlg,data[group==1|group==3,]$group,pool.sd=T)

Pairwise comparisons using t tests with pooled SD

data: data[group == 1 | group == 3, ]$AbOAlg and data[group == 1 | group == 3, ]$group

| 1 |  |
| --- | --- |
| 3 | 0.0061 |

P value adjustment method: holm

**########## O Algeria serology in O Combo groups**

> summary(aov(data[group!=1&group!=3,]$AbOAlg~data[group!=1&group!=3,]$group))

|  | Df | Sum Sq | Mean Sq | F value | Pr(>F) |  |
| --- | --- | --- | --- | --- | --- | --- |
| data[group != 1 & group != 3, ]$group | 2 | 7.701 | 3.85 | 24.22 | 0.00015 | *** |
| Residuals | 10 | 1.59 | 0.159 | --- |  |  |

Signif. codes: 0 ‘***’ 0.001 ‘**’ 0.01 ‘*’ 0.05 ‘.’ 0.1 ‘ ’ 1

> pairwise.t.test(data[group!=1&group!=3,]$AbOAlg,data[group!=1&group!=3,]$group,pool.sd=F)

Pairwise comparisons using t tests with non-pooled SD

data: data[group != 1 & group != 3, ]$AbOAlg and data[group != 1 & group != 3, ]$group

|  | 2 | 4 |
| --- | --- | --- |
| 4 | 0.06382 | - |
| 5 | 0.00011 | 0.00807 |

P value adjustment method: holm

**########## O Algeria serology in O3039 groups**

> summary(aov(data[group!=2&group!=4,]$AbOAlg~data[group!=2&group!=4,]$group))

|  | Df | Sum Sq | Mean Sq | F value | Pr(>F) |  |
| --- | --- | --- | --- | --- | --- | --- |
| data[group != 2 & group != 4, ]$group | 2 | 7.529 | 3.765 | 29.32 | 6.56E-05 | *** |
| Residuals | 10 | 1.284 | 0.128 | --- |  |  |

Signif. codes: 0 ‘***’ 0.001 ‘**’ 0.01 ‘*’ 0.05 ‘.’ 0.1 ‘ ’ 1

> pairwise.t.test(data[group!=2&group!=4,]$AbOAlg,data[group!=2&group!=4,]$group,pool.sd=F)

Pairwise comparisons using t tests with non-pooled SD

data: data[group != 2 & group != 4, ]$AbOAlg and data[group != 2 & group != 4, ]$group

|  | 1 | 3 |
| --- | --- | --- |
| 3 | 0.022 | - |
| 5 | 9.70E-07 | 0.022 |

P value adjustment method: holm

**###############Figure 3**

> par(bty='n',mfrow=c(1,3))

> boxplot(AbO3039~day, ylim=c(0.5,3),ylab="O3039 VNT titre",xlab="Day")

> boxplot(AbOManisa~day, ylim=c(0.5,3),ylab="O Manisa VNT titre",xlab="Day")

> boxplot(AbOAlg~day, ylim=c(0.5,3),ylab="O Algeria VNT titre",xlab="Day")


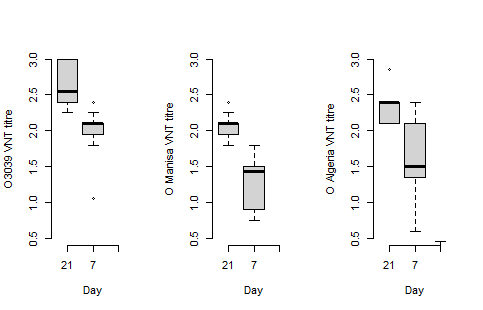


**###### Statistics for Figure 3 #####**

**######### O Algeria titers**

> tapply(AbOAlg,paste(group,day,vaccine),mean)

| 1 21 Combo | 2 21 O3039 | 3 7 Combo | 4 7 O3039 | 5 control Control |
| --- | --- | --- | --- | --- |
| 2.34 | 2.37 | 1.41 | 1.74 | 0.35 |

> summary(aov(AbOAlg~group))

|  | Df | Sum Sq | Mean Sq | F value | Pr(>F) |  |
| --- | --- | --- | --- | --- | --- | --- |
| group | 4 | 10.121 | 2.5301 | 15.93 | 9.79E-06 | *** |
| Residuals | 18 | 2.859 | 0.1588 | --- |  |  |

Signif. codes: 0 ‘***’ 0.001 ‘**’ 0.01 ‘*’ 0.05 ‘.’ 0.1 ‘ ’ 1

> pairwise.t.test(AbOAlg,group)

Pairwise comparisons using t tests with pooled SD

data: AbOAlg and group

|  | 1 | 2 | 3 | 4 |
| --- | --- | --- | --- | --- |
| 2 | 0.9066 | - | - | - |
| 3 | 0.0101 | 0.009 | - | - |
| 4 | 0.0893 | 0.0893 | 0.4139 | - |
| 5 | 1.90E-05 | 1.70E-05 | 0.0101 | 0.0012 |

P value adjustment method: holm

> tapply(AbOAlg,vaccine,mean)

| Combo | O3039 | Control |
| --- | --- | --- |
| 1.875 | 2.055 | 0.35 |

> summary(aov(AbOAlg~vaccine))

|  | Df | Sum Sq | Mean Sq | F value | Pr(>F) |  |
| --- | --- | --- | --- | --- | --- | --- |
| vaccine | 2 | 6.966 | 3.483 | 11.58 | 0.00046 | *** |
| Residuals | 20 | 6.014 | 0.301 | --- |  |  |

Signif. codes: 0 ‘***’ 0.001 ‘**’ 0.01 ‘*’ 0.05 ‘.’ 0.1 ‘ ’ 1

> pairwise.t.test(AbOAlg,vaccine)

Pairwise comparisons using t tests with pooled SD

data: AbOAlg and vaccine

|  | Combo | Control |
| --- | --- | --- |
| O3039 | 0.47145 | 0.00039 |
| Control | 0.00083 | - |

P value adjustment method: holm

> summary(aov(AbOAlg~vaccine+day,data[vaccine!="control",]))

|  | Df | Sum Sq | Mean Sq | F value | Pr(>F) |  |
| --- | --- | --- | --- | --- | --- | --- |
| vaccine | 2 | 6.966 | 3.483 | 22.27 | 1.04E-05 | *** |
| day | 1 | 3.042 | 3.042 | 19.45 | 0.000301 | *** |
| Residuals | 19 | 2.972 | 0.156 | --- |  |  |

Signif. codes: 0 ‘***’ 0.001 ‘**’ 0.01 ‘*’ 0.05 ‘.’ 0.1 ‘ ’ 1

> summary(aov(AbOAlg~day))

|  | Df | Sum Sq | Mean Sq | F value | Pr(>F) |  |
| --- | --- | --- | --- | --- | --- | --- |
| day | 2 | 9.846 | 4.923 | 31.42 | 6.73E-07 | *** |
| Residuals | 20 | 3.133 | 0.157 | --- |  |  |

Signif. codes: 0 ‘***’ 0.001 ‘**’ 0.01 ‘*’ 0.05 ‘.’ 0.1 ‘ ’ 1

> pairwise.t.test(AbOAlg,day)

Pairwise comparisons using t tests with pooled SD

data: AbOAlg and day

|  | 21 | 7 |
| --- | --- | --- |
| 7 | 0.00027 | - |
| control | 6.30E-07 | 0.00027 |

P value adjustment method: holm

**######### O3039 titers**

> tapply(AbO3039,paste(group,day,vaccine),mean)

| 1 21 Combo | 2 21 O3039 | 3 7 Combo | 4 7 O3039 | 5 control Control |
| --- | --- | --- | --- | --- |
| 2.49 | 2.76 | 1.95 | 2.01 | 0.3 |

> summary(aov(AbO3039~group))

|  | Df | Sum Sq | Mean Sq | F value | Pr(>F) |  |
| --- | --- | --- | --- | --- | --- | --- |
| group | 4 | 12.732 | 3.183 | 31.99 | 5.86E-08 | *** |
| Residuals | 18 | 1.791 | 0.099 | --- |  |  |

Signif. codes: 0 ‘***’ 0.001 ‘**’ 0.01 ‘*’ 0.05 ‘.’ 0.1 ‘ ’ 1

> pairwise.t.test(AbO3039,group)

Pairwise comparisons using t tests with pooled SD

data: AbO3039 and group

|  | 1 | 2 | 3 | 4 |
| --- | --- | --- | --- | --- |
| 2 | 0.3854 | - | - | - |
| 3 | 0.0578 | 0.0044 | - | - |
| 4 | 0.0813 | 0.0072 | 0.767 | - |
| 5 | 1.70E-07 | 3.20E-08 | 8.00E-06 | 5.60E-06 |

P value adjustment method: holm

> tapply(AbO3039,vaccine,mean)

| Combo | O3039 | Control |
| --- | --- | --- |
| 2.22 | 2.39 | 0.30 |

> summary(aov(AbO3039~vaccine))

|  | Df | Sum Sq | Mean Sq | F value | Pr(>F) |  |
| --- | --- | --- | --- | --- | --- | --- |
| vaccine | 2 | 10.597 | 5.299 | 26.99 | 2.09E-06 | *** |
| Residuals | 20 | 3.926 | 0.196 | --- |  |  |

Signif. codes: 0 ‘***’ 0.001 ‘**’ 0.01 ‘*’ 0.05 ‘.’ 0.1 ‘ ’ 1

> pairwise.t.test(AbO3039,vaccine)

Pairwise comparisons using t tests with pooled SD

data: AbO3039 and vaccine

|  | Combo | Control |
| --- | --- | --- |
| O3039 | 0.41 | 1.90E-06 |
| Control | 4.10E-06 | - |

P value adjustment method: holm

> summary(aov(AbO3039~vaccine+day,data[vaccine!="control",]))

|  | Df | Sum Sq | Mean Sq | F value | Pr(>F) |  |
| --- | --- | --- | --- | --- | --- | --- |
| vaccine | 2 | 10.597 | 5.299 | 54.53 | 1.34E-08 | *** |
| day | 1 | 2.08 | 2.08 | 21.41 | 0.00018 | *** |
| Residuals | 19 | 1.846 | 0.097 | --- |  |  |

Signif. codes: 0 ‘***’ 0.001 ‘**’ 0.01 ‘*’ 0.05 ‘.’ 0.1 ‘ ’ 1

> summary(aov(AbO3039~day))

|  | Df | Sum Sq | Mean Sq | F value | Pr(>F) |  |
| --- | --- | --- | --- | --- | --- | --- |
| day | 2 | 12.541 | 6.271 | 63.27 | 2.24E-09 | *** |
| Residuals | 20 | 1.982 | 0.099 | --- |  |  |

Signif. codes: 0 ‘***’ 0.001 ‘**’ 0.01 ‘*’ 0.05 ‘.’ 0.1 ‘ ’ 1

> pairwise.t.test(AbO3039,day)

Pairwise comparisons using t tests with pooled SD

data: AbO3039 and day

|  | 21 | 7 |
| --- | --- | --- |
| 7 | 0.00018 | - |
| control | 1.30E-09 | 1.90E-07 |

P value adjustment method: holm

**############ O Manisa titers**

> tapply(AbOManisa,paste(group,day,vaccine),mean)

| 1 21 Combo | 2 21 O3039 | 3 7 Combo | 4 7 O3039 | 5 control Control |
| --- | --- | --- | --- | --- |
| 2.13 | 2.01 | 1.29 | 1.29 | 0.30 |

> summary(aov(AbOManisa~group))

|  | Df | Sum Sq | Mean Sq | F value | Pr(>F) |  |
| --- | --- | --- | --- | --- | --- | --- |
| group | 4 | 8.046 | 2.011 | 21.63 | 1.13E-06 | *** |
| Residuals | 18 | 1.674 | 0.093 | --- |  |  |

Signif. codes: 0 ‘***’ 0.001 ‘**’ 0.01 ‘*’ 0.05 ‘.’ 0.1 ‘ ’ 1

> pairwise.t.test(AbOManisa,group)

Pairwise comparisons using t tests with pooled SD

data: AbOManisa and group

|  | 1 | 2 | 3 | 4 |
| --- | --- | --- | --- | --- |
| 2 | 1 | - | - | - |
| 3 | 0.0025 | 0.0061 | - | - |
| 4 | 0.0025 | 0.0061 | 1 | - |
| 5 | 1.70E-06 | 3.90E-06 | 0.0025 | 0.0025 |

P value adjustment method: holm

> tapply(AbOManisa,vaccine,mean)

| Combo | O3039 | Control |
| --- | --- | --- |
| 1.71 | 1.65 | 0.30 |

> summary(aov(AbOManisa~vaccine))

|  | Df | Sum Sq | Mean Sq | F value | Pr(>F) |  |
| --- | --- | --- | --- | --- | --- | --- |
| vaccine | 2 | 4.986 | 2.493 | 10.53 | 0.00075 | *** |
| Residuals | 20 | 4.734 | 0.2367 | --- |  |  |

Signif. codes: 0 ‘***’ 0.001 ‘**’ 0.01 ‘*’ 0.05 ‘.’ 0.1 ‘ ’ 1

> pairwise.t.test(AbOManisa,vaccine)

Pairwise comparisons using t tests with pooled SD

data: AbOManisa and vaccine

|  | Combo | Control |
| --- | --- | --- |
| O3039 | 0.78556 | 0.00085 |
| Control | 0.00082 | - |

P value adjustment method: holm

> summary(aov(AbOManisa~vaccine+day,data[vaccine!="control",]))

|  | Df | Sum Sq | Mean Sq | F value | Pr(>F) |  |
| --- | --- | --- | --- | --- | --- | --- |
| vaccine | 2 | 4.986 | 2.493 | 28 | 2.17E-06 | *** |
| day | 1 | 3.042 | 3.042 | 34.16 | 1.25E-05 | *** |
| Residuals | 19 | 1.692 | 0.0891 | --- |  |  |

Signif. codes: 0 ‘***’ 0.001 ‘**’ 0.01 ‘*’ 0.05 ‘.’ 0.1 ‘ ’ 1

> summary(aov(AbOManisa~day))

|  | Df | Sum Sq | Mean Sq | F value | Pr(>F) |  |
| --- | --- | --- | --- | --- | --- | --- |
| day | 2 | 8.01 | 4.005 | 46.84 | 2.84E-08 | *** |
| Residuals | 20 | 1.71 | 0.086 | --- |  |  |

Signif. codes: 0 ‘***’ 0.001 ‘**’ 0.01 ‘*’ 0.05 ‘.’ 0.1 ‘ ’ 1

> pairwise.t.test(AbOManisa,day)

Pairwise comparisons using t tests with pooled SD

data: AbOManisa and day

|  | 21 | 7 |
| --- | --- | --- |
| 7 | 1.60E-05 | - |
| control | 3.80E-08 | 4.90E-05 |

P value adjustment method: holm

**###############Linear Models Ab O3039 #############**

> q0<-lm(AbO3039~1,data[vaccine!="control",])

> q1<-lm(AbO3039~day,data[vaccine!="control",])

> q2<-lm(AbO3039~vaccine,data[vaccine!="control",])

> AIC(q0,q1,q2)

|  | df | AIC |
| --- | --- | --- |
| q0 | 2 | 58.69709 |
| q1 | 4 | 16.89215 |
| q2 | 4 | 32.61156 |

> q3<-lm(AbO3039~day+vaccine,data[vaccine!="control",])

> AIC(q1,q3)

|  | df | AIC |
| --- | --- | --- |
| q1 | 4 | 16.89215 |
| q3 | 5 | 17.25585 |

> q4<-lm(AbO3039~day+vaccine+day:vaccine,data[vaccine!="control",])

> AIC(q1,q4)

|  | df | AIC |
| --- | --- | --- |
| q1 | 4 | 16.89215 |
| q4 | 6 | 18.55861 |

> summary(q1)

Call:

lm(formula = AbO3039 ~ day, data = data[vaccine != "control", ])

Residuals:

| Min | 1Q | Median | 3Q | Max |
| --- | --- | --- | --- | --- |
| -0.930 | -0.203 | 0.000 | 0.120 | 0.420 |

Coefficients:

|  | Estimate | Std. Error | t value | Pr(>|t|) |  |
| --- | --- | --- | --- | --- | --- |
| (Intercept) | 2.625 | 0.09956 | 26.367 | < 2e-16 | *** |
| day7 | -0.645 | 0.14079 | -4.581 | 0.000181 | *** |
| daycontrol | -2.325 | 0.20724 | -11.219 | 4.42E-10 | *** |

Signif. codes: 0 ‘***’ 0.001 ‘**’ 0.01 ‘*’ 0.05 ‘.’ 0.1 ‘ ’ 1

Residual standard error: 0.3148 on 20 degrees of freedom

Multiple R-squared: 0.8635, Adjusted R-squared: 0.8499

F-statistic: 63.27 on 2 and 20 DF, p-value: 2.244e-09

**###############Linear Models Ab OManisa**

> q0<-lm(AbOManisa~1,data[vaccine!="control",])

> q1<-lm(AbOManisa~day,data[vaccine!="control",])

> q2<-lm(AbOManisa~vaccine,data[vaccine!="control",])

> AIC(q0,q1,q2)

|  | df | AIC |
| --- | --- | --- |
| q0 | 2 | 49.46107 |
| q1 | 4 | 13.49415 |
| q2 | 4 | 36.91453 |

> q3<-lm(AbOManisa~day+vaccine,data[vaccine!="control",])

> AIC(q1,q3)

|  | df | AIC |
| --- | --- | --- |
| q1 | 4 | 13.49415 |
| q3 | 5 | 15.25076 |

> q4<-lm(AbOManisa~day+vaccine+day:vaccine,data[vaccine!="control",])

> AIC(q1,q4)

|  | df | AIC |
| --- | --- | --- |
| q1 | 4 | 13.49415 |
| q4 | 6 | 17.00477 |

> summary(q1)

Call:

lm(formula = AbOManisa ~ day, data = data[vaccine != "control", ])

Residuals:

| Min | 1Q | Median | 3Q | Max |
| --- | --- | --- | --- | --- |
| -0.54 | -0.12 | 0.03 | 0.20 | 0.51 |

Coefficients:

|  | Estimate | Std. Error | t value | Pr(>|t|) |  |
| --- | --- | --- | --- | --- | --- |
| (Intercept) | 2.07 | 0.09247 | 22.387 | 1.24E-15 | *** |
| day7 | -0.78 | 0.13077 | -5.965 | 7.83E-06 | *** |
| daycontrol | -1.77 | 0.19248 | -9.196 | 1.27E-08 | *** |

Signif. codes: 0 ‘***’ 0.001 ‘**’ 0.01 ‘*’ 0.05 ‘.’ 0.1 ‘ ’ 1

Residual standard error: 0.2924 on 20 degrees of freedom

Multiple R-squared: 0.8241, Adjusted R-squared: 0.8065

F-statistic: 46.84 on 2 and 20 DF, p-value: 2.84e-08

**###############Linear Models Ab O Algeria**

> > q0<-lm(AbOAlg~1,data[vaccine!="control",])

> q1<-lm(AbOAlg~day,data[vaccine!="control",])

> q2<-lm(AbOAlg~vaccine,data[vaccine!="control",])

> AIC(q0,q1,q2)

|  | df | AIC |
| --- | --- | --- |
| q0 | 2 | 56.11246 |
| q1 | 4 | 27.42427 |
| q2 | 4 | 42.41697 |

> q3<-lm(AbOAlg~day+vaccine,data[vaccine!="control",])

> AIC(q1,q3)

|  | df | AIC |
| --- | --- | --- |
| q1 | 4 | 27.42427 |
| q3 | 5 | 28.20334 |

> q4<-lm(AbOAlg~day+vaccine+day:vaccine,data[vaccine!="control",])

> AIC(q1,q4)

|  | df | AIC |
| --- | --- | --- |
| q1 | 4 | 27.42427 |
| q4 | 6 | 29.31566 |

> summary(q1)

Call:

lm(formula = AbOAlg ~ day, data = data[vaccine != "control", ])

Residuals:

| Min | 1Q | Median | 3Q | Max |
| --- | --- | --- | --- | --- |
| -0.975 | -0.225 | 0.045 | 0.0875 | 0.825 |

Coefficients:

|  | Estimate | Std. Error | t value | Pr(>|t|) |  |
| --- | --- | --- | --- | --- | --- |
| (Intercept) | 2.355 | 0.1252 | 18.814 | 3.46E-14 | *** |
| day7 | -0.78 | 0.177 | -4.406 | 0.000272 | *** |
| daycontrol | -2.005 | 0.2606 | -7.695 | 2.11E-07 | *** |

Signif. codes: 0 ‘***’ 0.001 ‘**’ 0.01 ‘*’ 0.05 ‘.’ 0.1 ‘ ’ 1

Residual standard error: 0.3958 on 20 degrees of freedom

Multiple R-squared: 0.7586, Adjusted R-squared: 0.7344

F-statistic: 31.42 on 2 and 20 DF, p-value: 6.725e-07

**############ NOW WITHOUT CONTROLS ######################**

**######### Comparison of r1 values ############**

> data<-data[data$group!=5,]

> attach(droplevels(data))

> table(paste(vaccine,day),group)

> exp(tapply(log(r1O3039),paste(vaccine,day),mean))

Combo 21 Combo 7 O3039 21 O3039 7

0.7079458 0.2884032 0.4073803 0.5370318

> exp(tapply(log(r1O3039),paste(vaccine,day),min))

Combo 21 Combo 7 O3039 21 O3039 7

0.1258925 0.1258925 0.1258925 0.1778279

> exp(tapply(log(r1O3039),paste(vaccine,day),max))

Combo 21 Combo 7 O3039 21 O3039 7

1.4125375 0.5011872 1.0000000 1.9952623

> m0<-lm(AbO3039~1)

> m1<-lm(AbO3039~vaccine)

> m2<-lm(AbO3039~day)

> AIC(m0,m1,m2)#m2 has low AIC

|  | df | AIC |
| --- | --- | --- |
| m0 | 2 | 28.87825 |
| m1 | 3 | 30.19659 |
| m2 | 3 | 16.52755 |

> anova(m0,m1)

Analysis of Variance Table

Model 1: AbO3039 ~ 1

Model 2: AbO3039 ~ vaccine

|  | Res.Df | RSS | Df | Sum of Sq | F | Pr(>F) |
| --- | --- | --- | --- | --- | --- | --- |
| 1 | 19 | 4.0624 |  |  |  |  |
| 2 | 18 | 3.9262 | 1 | 0.13612 | 0.62410 | 0.43980 |

> summary(aov(AbO3039~vaccine))

|  | Df | Sum Sq | Mean Sq | F value | Pr(>F) |
| --- | --- | --- | --- | --- | --- |
| vaccine | 1 | 0.136 | 0.1361 | 0.624 | 0.44 |
| Residuals | 18 | 3.926 | 0.2181 |  |  |

#pairwise.t.test(AbO3039,vaccine); No difference in type of vaccine

> anova(m0,m2)

Analysis of Variance Table

Model 1: AbO3039 ~ 1

Model 2: AbO3039 ~ day

|  | Res.Df | RSS | Df | Sum of Sq | F | Pr(>F) |  |
| --- | --- | --- | --- | --- | --- | --- | --- |
| 1 | 19 | 4.0624 |  |  |  |  |  |
| 2 | 18 | 1.9823 | 1 | 2.08010 | 18.889 | 0.0003892 | *** |

Signif. codes: 0 ‘***’ 0.001 ‘**’ 0.01 ‘*’ 0.05 ‘.’ 0.1 ‘ ’ 1

> summary(aov(AbO3039~day))

|  | Df | Sum Sq | Mean Sq | F value | Pr(>F) |  |
| --- | --- | --- | --- | --- | --- | --- |
| vaccine | 1 | 2.080 | 2.0801 | 18.89 | 0.000389 | *** |
| Residuals | 18 | 1.982 | 0.1101 |  |  |  |

Signif. codes: 0 ‘***’ 0.001 ‘**’ 0.01 ‘*’ 0.05 ‘.’ 0.1 ‘ ’ 1

> pairwise.t.test(AbO3039,day)

Pairwise comparisons using t tests with pooled SD

data: AbO3039 and day

|  | 21 |
| --- | --- |
| 7 | 0.00039 |

P value adjustment method: holm

> m3<-lm(AbO3039~day+vaccine)

> AIC(m2,m3)

|  | df | AIC |
| --- | --- | --- |
| m2 | 3 | 16.52755 |
| m3 | 4 | 17.10467 |

> anova(m2,m3)

Analysis of Variance Table

Model 1: AbO3039 ~ day

Model 2: AbO3039 ~ day + vaccine

|  | Res.Df | RSS | Df | Sum of Sq | F | Pr(>F) |
| --- | --- | --- | --- | --- | --- | --- |
| 1 | 18 | 1.9823 |  |  |  |  |
| 2 | 17 | 1.8461 | 1 | 0.13612 | 1.254 | 0.2785 |

> data<-data[data$group!=5,]

> attach(droplevels(data))

> table(paste(vaccine,day),group)

> exp(tapply(log(r1Oman),paste(vaccine,day),mean))

Combo 21 Combo 7 O3039 21 O3039 7

1.621810 1.318257 NA NA

> exp(tapply(log(r1Oman),paste(vaccine,day),min))

Combo 21 Combo 7 O3039 21 O3039 7

0.5011872 0.7079458 NA NA

> exp(tapply(log(r1Oman),paste(vaccine,day),max))

Combo 21 Combo 7 O3039 21 O3039 7

2.818383 3.981072 NA NA

> m0<-lm(AbOManisa~1)

> m1<-lm(AbOManisa~vaccine)

> m2<-lm(AbOManisa~day)

> AIC(m0,m1,m2)#m2 has low AIC

|  | df | AIC |
| --- | --- | --- |
| m0 | 2 | 32.01421 |
| m1 | 3 | 33.93831 |
| m2 | 3 | 13.57276 |

> anova(m0,m1)

Analysis of Variance Table

Model 1: AbOManisa ~ 1

Model 2: AbOManisa ~ vaccine

|  | Res.Df | RSS | Df | Sum of Sq | F | Pr(>F) |
| --- | --- | --- | --- | --- | --- | --- |
| 1 | 19 | 4.752 |  |  |  |  |
| 2 | 18 | 4.734 | 1 | 0.018 | 0.0684 | 0.7966 |

> summary(aov(AbOManisa~vaccine))

|  | Df | Sum Sq | Mean Sq | F value | Pr(>F) |
| --- | --- | --- | --- | --- | --- |
| vaccine | 1 | 0.018 | 0.018 | 0.068 | 0.797 |
| Residuals | 18 | 4.734 | 0.263 |  |  |

#pairwise.t.test(AbOManisa,vaccine); No difference in type of vaccine

> anova(m0,m2)

Analysis of Variance Table

Model 1: AbOManisa ~ 1

Model 2: AbOManisa ~ day

|  | Res.Df | RSS | Df | Sum of Sq | F | Pr(>F) |  |
| --- | --- | --- | --- | --- | --- | --- | --- |
| 1 | 19 | 4.752 |  |  |  |  |  |
| 2 | 18 | 1.710 | 1 | 3.042 | 32.021 | 2.28E-05 | *** |

Signif. codes: 0 ‘***’ 0.001 ‘**’ 0.01 ‘*’ 0.05 ‘.’ 0.1 ‘ ’ 1

> summary(aov(AbOManisa~day))

|  | Df | Sum Sq | Mean Sq | F value | Pr(>F) |  |
| --- | --- | --- | --- | --- | --- | --- |
| day | 1 | 3.042 | 3.042 | 32.02 | 2.28E-05 | *** |
| Residuals | 18 | 1.710 | 0.095 |  |  |  |

Signif. codes: 0 ‘***’ 0.001 ‘**’ 0.01 ‘*’ 0.05 ‘.’ 0.1 ‘ ’ 1

> pairwise.t.test(AbOManisa,day)

Pairwise comparisons using t tests with pooled SD

data: AbOManisa and day

|  | 21 |
| --- | --- |
| 7 | 2.28E-05 |

P value adjustment method: holm

> m3<-lm(AbOManisa~day+vaccine)

> AIC(m2,m3)

|  | df | AIC |
| --- | --- | --- |
| m2 | 3 | 13.57276 |
| m3 | 4 | 15.36112 |

> anova(m2,m3)

Analysis of Variance Table

Model 1: AbOManisa ~ day

Model 2: AbOManisa ~ day + vaccine

|  | Res.Df | RSS | Df | Sum of Sq | F | Pr(>F) |
| --- | --- | --- | --- | --- | --- | --- |
| 1 | 18.00 | 1.71 |  |  |  |  |
| 2 | 17 | 1.692 | 1 | 0.018 | 0.1809 | 0.676 |

##########

> table(paste(vaccine,day),group)

> m0<-lm(AbOAlg~1)

> m1<-lm(AbOAlg~vaccine)

> m2<-lm(AbOAlg~day)

> m3<-lm(AbOAlg~prot1)

> AIC(m0,m1,m2)

|  | df | AIC |
| --- | --- | --- |
| m0 | 2 | 37.20605 |
| m1 | 3 | 38.67308 |
| m2 | 3 | 25.58994 |

> anova(m0,m1)

Analysis of Variance Table

Model 1: AbOAlg ~ 1

Model 2: AbOAlg ~ vaccine

|  | Res.Df | RSS | Df | Sum of Sq | F | Pr(>F) |
| --- | --- | --- | --- | --- | --- | --- |
| 1 | 19 | 6.1605 |  |  |  |  |
| 2 | 18 | 5.9985 | 1 | 0.162 | 0.4861 | 0.4946 |

> anova(m0,m2)

Analysis of Variance Table

Model 1: AbOAlg ~ 1

Model 2: AbOAlg ~ day

|  | Res.Df | RSS | Df | Sum of Sq | F | Pr(>F) |  |
| --- | --- | --- | --- | --- | --- | --- | --- |
| 1 | 19 | 6.1605 |  |  |  |  |  |
| 2 | 18 | 3.1185 | 1 | 3.042 | 17.558 | 0.00055 | *** |

Signif. codes: 0 ‘***’ 0.001 ‘**’ 0.01 ‘*’ 0.05 ‘.’ 0.1 ‘ ’ 1

> summary(aov(AbOAlg~day))

|  | Df | Sum Sq | Mean Sq | F value | Pr(>F) |  |
| --- | --- | --- | --- | --- | --- | --- |
| day | 1 | 3.042 | 3.0420 | 17.56 | 0.00055 | *** |
| Residuals | 18 | 3.119 | 0.1732 |  |  |  |

Signif. codes: 0 ‘***’ 0.001 ‘**’ 0.01 ‘*’ 0.05 ‘.’ 0.1 ‘ ’ 1

> anova(m0,m3)

Analysis of Variance Table

Model 1: AbOAlg ~ 1

Model 2: AbOAlg ~ prot1

|  | Res.Df | RSS | Df | Sum of Sq | F | Pr(>F) |  |
| --- | --- | --- | --- | --- | --- | --- | --- |
| 1 | 19 | 6.1605 |  |  |  |  |  |
| 2 | 18 | 4.8256 | 1 | 1.3349 | 4.9794 | 0.03861 | * |

Signif. codes: 0 ‘***’ 0.001 ‘**’ 0.01 ‘*’ 0.05 ‘.’ 0.1 ‘ ’ 1

> m4<-lm(AbOAlg~prot1+vaccine)

> m5<-lm(AbOAlg~prot1+day)

> m6<-lm(AbOAlg~vaccine+day)

> AIC(m1,m2,m3,m4,m5,m6)

|  | df | AIC |
| --- | --- | --- |
| m1 | 3 | 38.67308 |
| m2 | 3 | 25.58994 |
| m3 | 3 | 34.32155 |
| m4 | 4 | 34.92804 |
| m5 | 4 | 26.14770 |
| m6 | 4 | 26.52302 |

> m7<-lm(AbOAlg~prot1+vaccine+day)

> m8<-lm(AbOAlg~vaccine+day+vaccine:day)

> AIC(m6,m7,m8)

|  | df | AIC |
| --- | --- | --- |
| m6 | 4 | 26.52302 |
| m7 | 5 | 26.49214 |
| m8 | 5 | 27.74713 |

> anova(m6,m7)

Analysis of Variance Table

Model 1: AbOAlg ~ vaccine + day

Model 2: AbOAlg ~ prot1 + vaccine + day

|  | Res.Df | RSS | Df | Sum of Sq | F | Pr(>F) |
| --- | --- | --- | --- | --- | --- | --- |
| 1 | 17 | 2.9565 |  |  |  |  |
| 2 | 16 | 2.6710 | 1 | 0.28548 | 1.7101 | 0.2095 |

> anova(m3,m4)

Analysis of Variance Table

Model 1: AbOAlg ~ prot1

Model 2: AbOAlg ~ prot1 + vaccine

|  | Res.Df | RSS | Df | Sum of Sq | F | Pr(>F) |
| --- | --- | --- | --- | --- | --- | --- |
| 1 | 18 | 4.8256 |  |  |  |  |
| 2 | 17 | 4.5008 | 1 | 0.32478 | 1.2267 | 0.2835 |

> anova(m2,m6)

Analysis of Variance Table

Model 1: AbOAlg ~ day

Model 2: AbOAlg ~ vaccine + day

|  | Res.Df | RSS | Df | Sum of Sq | F | Pr(>F) |
| --- | --- | --- | --- | --- | --- | --- |
| 1 | 18 | 3.12 |  |  |  |  |
| 2 | 17 | 3 | 1 | 0.16 | 0.9315 | 0.348 |

> summary(m3)

Call:

lm(formula = AbOAlg ~ prot1)

Residuals:

| Min | 1Q | Median | 3Q | Max |
| --- | --- | --- | --- | --- |
| -1.47353 | -0.06838 | 0.02647 | 0.32647 | 0.77647 |

Coefficients:

|  | Estimate | Std. Error | t value | Pr(>|t|) |  |
| --- | --- | --- | --- | --- | --- |
| (Intercept) | 1.3500 | 0.2989 | 4.516 | 0.000267 | *** |
| prot1 | 0.7235 | 0.3242 | 2.231 | 0.038605 | * |

Signif. codes: 0 ‘***’ 0.001 ‘**’ 0.01 ‘*’ 0.05 ‘.’ 0.1 ‘ ’ 1

Residual standard error: 0.5178 on 18 degrees of freedom

Multiple R-squared: 0.2167, Adjusted R-squared: 0.1732

F-statistic: 4.979 on 1 and 18 DF, p-value: 0.03861

**######## Figure 4 ########**

> par(bty='n',mfrow=c(1,3))

> boxplot(AbO3039~vaccine, ylim=c(0.5,3), ylab="O3039 VNT titre",xlab="vaccine")

> boxplot(AbOManisa~vaccine, ylim=c(0.5,3), ylab="0 Manisa VNT titre",xlab="vaccine")

> boxplot(AbOAlg~vaccine, ylim=c(0.5,3), ylab="O Algeria VNT titre",xlab="vaccine")


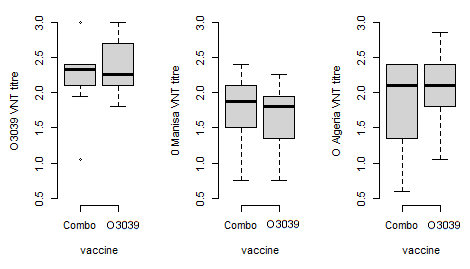


**####### Statistics for Figure 4 ###########**

> summary(aov(AbOAlg~vaccine))

|  | Df | Sum Sq | Mean Sq | F value | Pr(>F) |
| --- | --- | --- | --- | --- | --- |
| vaccine | 1 | 0.162 | 0.162 | 0.486 | 0.495 |
| Residuals | 18 | 5.998 | 0.3332 |  |  |

> summary(aov(data[prot1==1,]$AbOAlg~data[prot1==1,]$vaccine))

|  | Df | Sum Sq | Mean Sq | F value | Pr(>F) |
| --- | --- | --- | --- | --- | --- |
| data[prot1 == 1, ]$vaccine | 1 | 0.576 | 0.5759 | 2.123 | 0.166 |
| Residuals | 15 | 4.07 | 0.2713 |  |  |

> summary(aov(data[prot1==1,]$AbOAlg~data[prot1==1,]$day))

|  | Df | Sum Sq | Mean Sq | F value | Pr(>F) |  |
| --- | --- | --- | --- | --- | --- | --- |
| data[prot1 == 1, ]$day | 1 | 1.924 | 1.9241 | 10.61 | 0.00531 | ** |
| Residuals | 15 | 2.721 | 0.1814 |  |  |  |

Signif. codes: 0 ‘***’ 0.001 ‘**’ 0.01 ‘*’ 0.05 ‘.’ 0.1 ‘ ’ 1

> summary(aov(AbOAlg~vaccine+day))

|  | Df | Sum Sq | Mean Sq | F value | Pr(>F) |  |
| --- | --- | --- | --- | --- | --- | --- |
| vaccine | 1 | 0.162 | 0.162 | 0.932 | 0.348002 |  |
| day | 1 | 3.042 | 3.042 | 17.492 | 0.000625 | *** |
| Residuals | 17 | 2.957 | 0.1739 |  |  |  |

Signif. codes: 0 ‘***’ 0.001 ‘**’ 0.01 ‘*’ 0.05 ‘.’ 0.1 ‘ ’ 1

> summary(aov(data[prot1==1,]$AbOAlg~data[prot1==1,]$vaccine+data[prot1==1,]$day))

|  | Df | Sum Sq | Mean Sq | F value | Pr(>F) |  |
| --- | --- | --- | --- | --- | --- | --- |
| data[prot1 == 1, ]$vaccine | 1 | 0.5759 | 0.5759 | 3.533 | 0.08114 |  |
| data[prot1 == 1, ]$day | 1 | 1.7875 | 1.7875 | 10.965 | 0.00514 | ** |
| Residuals | 14 | 2.2822 | 0.163 |  |  |  |

Signif. codes: 0 ‘***’ 0.001 ‘**’ 0.01 ‘*’ 0.05 ‘.’ 0.1 ‘ ’ 1

> summary(aov(AbOAlg~paste(vaccine,day)))

|  | Df | Sum Sq | Mean Sq | F value | Pr(>F) |  |
| --- | --- | --- | --- | --- | --- | --- |
| paste(vaccine, day) | 3 | 3.316 | 1.1055 | 6.219 | 0.00528 | ** |
| Residuals | 16 | 2.844 | 0.1777 |  |  |  |

Signif. codes: 0 ‘***’ 0.001 ‘**’ 0.01 ‘*’ 0.05 ‘.’ 0.1 ‘ ’ 1

**############# Ab PROTECTION RELATION ###############**

> m0<-glm(prot1~1,family='binomial')

> m1<-glm(prot1~AbOAlg,family='binomial')

> m2<-glm(prot1~group,family='binomial')

> m3<-glm(prot1~day,family='binomial')

> m4<-glm(prot1~vaccine,family='binomial')

> AIC(m0,m1,m2,m3,m4)

|  | df | AIC |
| --- | --- | --- |
| m0 | 1 | 18.9084 |
| m1 | 2 | 16.8716 |
| m2 | 4 | 19.7341 |
| m3 | 2 | 16.2173 |
| m4 | 2 | 20.5097 |

> anova(m0,m1,test='Chisq')

Analysis of Deviance Table

Model 1: prot1 ~ 1

Model 2: prot1 ~ AbOAlg

|  | Resid. Df | Resid. Dev | Df | Deviance | Pr(>Chi) |  |
| --- | --- | --- | --- | --- | --- | --- |
| 1 | 19 | 16.908 |  |  |  |  |
| 2 | 18 | 12.872 | 1 | 4.0367 | 0.04452 | * |

Signif. codes: 0 ‘***’ 0.001 ‘**’ 0.01 ‘*’ 0.05 ‘.’ 0.1 ‘ ’ 1

> m5<-glm(prot1~AbOAlg+group,family='binomial')

> m6<-glm(prot1~AbOAlg+day,family='binomial')

> m7<-glm(prot1~AbOAlg+vaccine,family='binomial')

> AIC(m1,m5,m6,m7)

|  | df | AIC |
| --- | --- | --- |
| m1 | 2 | 16.8716 |
| m5 | 5 | 20.2138 |
| m6 | 3 | 17.3856 |
| m7 | 3 | 17.5166 |

> summary(m1)

Call:

glm(formula = prot1 ~ AbOAlg, family = "binomial")

Deviance Residuals:

| Min | 1Q | Median | 3Q | Max |
| --- | --- | --- | --- | --- |
| -1.8619 | 0.2737 | 0.2737 | 0.3832 | 1.5659 |

Coefficients:

|  | Estimate | Std. Error | z value | Pr(>|z|) |
| --- | --- | --- | --- | --- |
| (Intercept) | -2.26 | 2.155 | -1.049 | 0.2943 |
| AbOAlg | 2.302 | 1.309 | 1.759 | 0.0785 |

Signif. codes: 0 ‘***’ 0.001 ‘**’ 0.01 ‘*’ 0.05 ‘.’ 0.1 ‘ ’ 1

(Dispersion parameter for binomial family taken to be 1)

Null deviance: 16.908 on 19 degrees of freedom

Residual deviance: 12.872 on 18 degrees of freedom

AIC: 16.872

Number of Fisher Scoring iterations: 5

**########## PA50 values ###########**

> p=0.5 #probability of protection

> (log(p/(1-p))-coef(m1)[1])/coef(m1)[2]

(Intercept) = 0.9816138

> p=0.95 #probability of protection

> (log(p/(1-p))-coef(m1)[1])/coef(m1)[2]

(Intercept) = 2.260536

> par(bty='n')

> plot(c(log10(1/2),log10(1024)),c(-0.1,1.1),type="n",axes=F,xlab=expression(paste("O Algeria titre log"[10])), xlim = c(0.5,3.5), ylab = "Fraction protected");axis(1);axis(2)

> lines(rep(0:300,1)/100, predict.glm(m1, data.frame(AbOAlg=rep(0:300,1)/100), type="response"),col="red",lty=1,lwd=2)

> points(AbOAlg,jitter(prot1,factor=0.2))


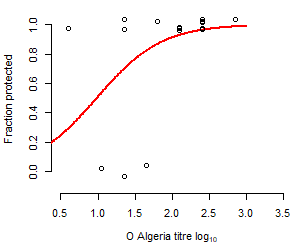


**####### body temperature #######**

> body<-read.csv("bodytemp.csv",sep=';')

> attach(body)

> summary(body)

> f0<-lmer(temp~1+(1|animal))

> f1<-lmer(temp~group+(1|animal))

> f2<-lmer(temp~factor(dpi)+(1|animal))

> f3<-lmer(temp~prot+(1|animal))

> AIC(f0,f1,f2,f3)

|  | df | AIC |
| --- | --- | --- |
| f0 | 3 | 947.4081 |
| f1 | 7 | 966.3614 |
| f2 | 36 | 476.3922 |
| f3 | 4 | 948.8909 |

> f4<-lmer(temp~factor(dpi)+group+(1|animal))

> f5<-lmer(temp~factor(dpi)+prot+(1|animal))

> AIC(f2,f4,f5)

|  | df | AIC |
| --- | --- | --- |
| f2 | 36 | 476.3922 |
| f4 | 40 | 495.3455 |
| f5 | 37 | 477.8750 |

> summary(f2)

Linear mixed model fit by REML ['lmerMod']

Formula: temp ~ factor(dpi) + (1 | animal)

REML criterion at convergence: 404.4

| Min | 1Q | Median | 3Q | Max |
| --- | --- | --- | --- | --- |
| -5.079 | -0.3955 | 0.0407 | 0.415 | 5.7126 |

Random effects:

Number of obs: 782, groups: animal, 23

| Groups | Name | Variance | Std.Dev. |
| --- | --- | --- | --- |
| animal | (Intercept) | 0.009398 | 0.09694 |
| Residual |  | 0.083230 | 0.28850 |

Fixed effects:

|  | Estimate | Std. Error | t value |
| --- | --- | --- | --- |
| (Intercept) | 3.89E+01 | 6.35E-02 | 612.904 |
| factor(dpi)1 | 1.17E+00 | 8.51E-02 | 13.748 |
| factor(dpi)2 | 1.27E+00 | 8.51E-02 | 14.974 |
| factor(dpi)3 | 6.83E-01 | 8.51E-02 | 8.024 |
| factor(dpi)4 | 3.70E-01 | 8.51E-02 | 4.344 |
| factor(dpi)5 | -7.39E-02 | 8.51E-02 | -0.869 |
| factor(dpi)6 | -1.26E-01 | 8.51E-02 | -1.482 |
| factor(dpi)7 | -1.00E-01 | 8.51E-02 | -1.175 |
| factor(dpi)8 | 8.70E-03 | 8.51E-02 | 0.102 |
| factor(dpi)9 | -5.22E-02 | 8.51E-02 | -0.613 |
| factor(dpi)10 | -2.61E-02 | 8.51E-02 | -0.307 |
| factor(dpi)11 | -9.57E-02 | 8.51E-02 | -1.124 |
| factor(dpi)12 | -7.83E-02 | 8.51E-02 | -0.920 |
| factor(dpi)13 | 8.44E-13 | 8.51E-02 | 0.000 |
| factor(dpi)14 | -8.70E-03 | 8.51E-02 | -0.102 |
| factor(dpi)15 | 8.59E-13 | 8.51E-02 | 0.000 |
| factor(dpi)16 | 7.83E-02 | 8.51E-02 | 0.920 |
| factor(dpi)17 | -4.78E-02 | 8.51E-02 | -0.562 |
| factor(dpi)18 | -6.96E-02 | 8.51E-02 | -0.818 |
| factor(dpi)19 | -1.26E-01 | 8.51E-02 | -1.482 |
| factor(dpi)20 | -9.13E-02 | 8.51E-02 | -1.073 |
| factor(dpi)21 | -3.91E-02 | 8.51E-02 | -0.460 |
| factor(dpi)22 | -3.04E-02 | 8.51E-02 | -0.358 |
| factor(dpi)23 | -2.17E-02 | 8.51E-02 | -0.256 |
| factor(dpi)24 | -1.74E-02 | 8.51E-02 | -0.204 |
| factor(dpi)25 | -4.78E-02 | 8.51E-02 | -0.562 |
| factor(dpi)26 | -8.70E-02 | 8.51E-02 | -1.022 |
| factor(dpi)27 | -1.44E-01 | 8.51E-02 | -1.687 |
| factor(dpi)28 | 2.17E-02 | 8.51E-02 | 0.256 |
| factor(dpi)29 | -8.70E-02 | 8.51E-02 | -1.022 |
| factor(dpi)30 | -7.39E-02 | 8.51E-02 | -0.869 |
| factor(dpi)31 | 5.65E-02 | 8.51E-02 | 0.664 |
| factor(dpi)32 | -6.96E-02 | 8.51E-02 | -0.818 |
| factor(dpi)33 | -1.30E-01 | 8.51E-02 | -1.533 |

Correlation matrix not shown by default, as p = 34 > 12.

Use print(x, correlation=TRUE) or vcov(x) if you need it

> for (i in 2:15){

+ f0<-lmer(temp~1+(1|animal),body[dpi<i,])

+ f1<-lmer(temp~group+(1|animal),body[dpi<i,])

+ f2<-lmer(temp~factor(dpi)+(1|animal),body[dpi<i,])

+ f3<-lmer(temp~factor(dpi)+group+(1|animal),body[dpi<i,])

+ print(i)

+ print(AIC(f0,f1,f2,f3)) }

boundary (singular) fit: see? is Singular

boundary (singular) fit: see? is Singular

boundary (singular) fit: see? is Singular

[1] 2

|  | df | AIC |
| --- | --- | --- |
| f0 | 3 | 120.07876 |
| f1 | 7 | 126.15642 |
| f2 | 4 | 91.16423 |
| f3 | 8 | 96.65586 |

boundary (singular) fit: see? is Singular

boundary (singular) fit: see? is Singular

[1] 3

|  | df | AIC |
| --- | --- | --- |
| f0 | 3 | 182.25030 |
| f1 | 7 | 187.17900 |
| f2 | 5 | 146.08060 |
| f3 | 9 | 149.69970 |

boundary (singular) fit: see? is Singular

[1] 4

| f0 | 3 | 230.00020 |
| --- | --- | --- |
| f1 | 7 | 232.15120 |
| f2 | 6 | 188.15440 |
| f3 | 10 | 190.22030 |

[1] 5

|  | df | AIC |
| --- | --- | --- |
| f0 | 3 | 278.70060 |
| f1 | 7 | 279.85200 |
| f2 | 7 | 228.93650 |
| f3 | 11 | 230.08790 |

boundary (singular) fit: see? is Singular

[1] 6

|  | df | AIC |
| --- | --- | --- |
| f0 | 3 | 334.35490 |
| f1 | 7 | 335.55210 |
| f2 | 8 | 260.76850 |
| f3 | 12 | 261.92160 |

boundary (singular) fit: see? is Singular

[1] 7

|  | df | AIC |
| --- | --- | --- |
| f0 | 3 | 383.77290 |
| f1 | 7 | 387.45840 |
| f2 | 9 | 287.34250 |
| f3 | 13 | 290.85250 |

boundary (singular) fit: see? is Singular

[1] 8

|  | df | AIC |
| --- | --- | --- |
| f0 | 3 | 427.19550 |
| f1 | 7 | 432.62610 |
| f2 | 10 | 309.84600 |
| f3 | 14 | 315.13510 |

boundary (singular) fit: see? is Singular

[1] 9

|  | df | AIC |
| --- | --- | --- |
| f0 | 3 | 463.94030 |
| f1 | 7 | 470.98280 |
| f2 | 11 | 331.38000 |
| f3 | 15 | 338.38030 |

boundary (singular) fit: see? is Singular

[1] 10

|  | df | AIC |
| --- | --- | --- |
| f0 | 3 | 499.34070 |
| f1 | 7 | 506.30530 |
| f2 | 12 | 348.50320 |
| f3 | 16 | 355.41730 |

boundary (singular) fit: see? is Singular

[1] 11

|  | df | AIC |
| --- | --- | --- |
| f0 | 3 | 532.43040 |
| f1 | 7 | 539.84640 |
| f2 | 13 | 367.52820 |
| f3 | 17 | 374.84470 |

boundary (singular) fit: see? is Singular

[1] 12

|  | df | AIC |
| --- | --- | --- |
| f0 | 3 | 564.35220 |
| f1 | 7 | 573.29890 |
| f2 | 14 | 382.03290 |
| f3 | 18 | 390.89560 |

boundary (singular) fit: see? is Singular

[1] 13

|  | df | AIC |
| --- | --- | --- |
| f0 | 3 | 594.07660 |
| f1 | 7 | 603.87160 |
| f2 | 15 | 394.36310 |
| f3 | 19 | 404.13700 |

[1] 14

|  | df | AIC |
| --- | --- | --- |
| f0 | 3 | 619.97490 |
| f1 | 7 | 630.79520 |
| f2 | 16 | 405.88200 |
| f3 | 20 | 416.70230 |

[1] 15

|  | df | AIC |
| --- | --- | --- |
| f0 | 3 | 647.16500 |
| f1 | 7 | 658.25870 |
| f2 | 17 | 423.36470 |
| f3 | 21 | 434.45840 |

> summary(f2)

Linear mixed model fit by REML ['lmerMod']

Formula: temp ~ factor(dpi) + (1 | animal)

Data: body[dpi < i, ]

REML criterion at convergence: 389.4

Scaled residuals:

| Min | 1Q | Median | 3Q | Max |
| --- | --- | --- | --- | --- |
| -3.6341 | -0.4303 | 0.0747 | 0.3981 | 3.8521 |

Random effects:

| Groups Name | Variance | Std.Dev. |
| --- | --- | --- |
| animal (Intercept) | 0.02027 | 0.1424 |
| Residual | 0.15362 | 0.3919 |

Number of obs: 345, groups: animal, 23

Fixed effects:

|  | Estimate | Std. Error | t value |
| --- | --- | --- | --- |
| (Intercept) | 3.89E+01 | 8.70E-02 | 447.334 |
| factor(dpi)1 | 1.17E+00 | 1.16E-01 | 10.119 |
| factor(dpi)2 | 1.27E+00 | 1.16E-01 | 11.022 |
| factor(dpi)3 | 6.83E-01 | 1.16E-01 | 5.906 |
| factor(dpi)4 | 3.70E-01 | 1.16E-01 | 3.198 |
| factor(dpi)5 | -7.39E-02 | 1.16E-01 | -0.640 |
| factor(dpi)6 | -1.26E-01 | 1.16E-01 | -1.091 |
| factor(dpi)7 | -1.00E-01 | 1.16E-01 | -0.865 |
| factor(dpi)8 | 8.70E-03 | 1.16E-01 | 0.075 |
| factor(dpi)9 | -5.22E-02 | 1.16E-01 | -0.451 |
| factor(dpi)10 | -2.61E-02 | 1.16E-01 | -0.226 |
| factor(dpi)11 | -9.57E-02 | 1.16E-01 | -0.828 |
| factor(dpi)12 | -7.83E-02 | 1.16E-01 | -0.677 |
| factor(dpi)13 | 6.05E-13 | 1.16E-01 | 0.000 |
| factor(dpi)14 | -8.70E-03 | 1.16E-01 | -0.075 |

Correlation matrix not shown by default, as p = 15 > 12.

Use print(x, correlation=TRUE) or vcov(x) if you need it

> print(f2, correlation=TRUE)

Linear mixed model fit by REML ['lmerMod']

Formula: temp ~ factor(dpi) + (1 | animal)

Data: body[dpi < i, ]

REML criterion at convergence: 389.3647

Random effects:

| Groups Name | Std.Dev. |
| --- | --- |
| animal (Intercept) | 0.1424 |
| Residual | 0.3919 |

Number of obs: 345, groups: animal, 23

Use print(x, correlation=TRUE) or vcov(x) if you need it

> detach(body)

**######## comparison of antibody titres between vaccine groups and controls #####**

> dat<-read.csv("Labresultaten LVZ194.csv",sep=';')

> dat$animal<-factor(dat$animal)

> dat$dpv<-factor(dat$dpv)

> dat$VNT<-ifelse(dat$VNT==0,0.3,dat$VNT)

> dat$VNtype<-factor(dat$VNtype)

> dat$VNtype<-relevel(dat$VNtype,ref="OAlg")

> dat$vactype<-factor(dat$vactype)

> dat<-dat[dat$vactype!="UVC",]

> droplevels(dat)

> summary(dat)

> attach(dat)

> tapply(VNT,VNtype,summary)

> tapply(VNT,paste(VNtype,vactype,dpv),summary)

> attach(dat[dat$vactype!="contr",])

**##### linear models #########**

> m0<-lm(VNT~1)

> m1<-lm(VNT~VNtype)

> m2<-lm(VNT~vactype)

> m3<-lm(VNT~dpv)

> AIC(m0,m1,m2,m3)

|  | df | AIC |
| --- | --- | --- |
| m0 | 2 | 104.83176 |
| m1 | 4 | 94.99438 |
| m2 | 5 | 76.27451 |
| m3 | 3 | 73.13838 |

> summary(m3)

Call:

lm(formula = VNT ~ dpv)

Residuals:

| Min | 1Q | Median | 3Q | Max |
| --- | --- | --- | --- | --- |
| -1.015 | -0.2537 | 0.0500 | 0.3387 | 0.7850 |

Coefficients:

|  | Estimate | Std. Error | t value | Pr(>|t|) |  |
| --- | --- | --- | --- | --- | --- |
| (Intercept) | 1.615000 | 0.07862 | 20.54 | < 2e-16 | *** |
| dpv21 | 0.735000 | 0.11119 | 6.61 | 1.32E-08 | *** |

---

Signif. codes: 0 ‘***’ 0.001 ‘**’ 0.01 ‘*’ 0.05 ‘.’ 0.1 ‘ ’ 1

Residual standard error: 0.4306 on 58 degrees of freedom

Multiple R-squared: 0.4297, Adjusted R-squared: 0.4198

F-statistic: 43.7 on 1 and 58 DF, p-value: 1.319e-08

> m4<-lm(VNT~dpv+VNtype)

> m5<-lm(VNT~dpv+vactype)

> AIC(m3,m4,m5)

|  | df | AIC |
| --- | --- | --- |
| m3 | 3 | 73.13838 |
| m4 | 5 | 50.2549 |
| m5 | 5 | 76.27451 |

> m6<-lm(VNT~dpv+VNtype+VNtype:dpv)

> m7<-lm(VNT~dpv+VNtype+vactype)

> m8<-lm(VNT~dpv+VNtype+vactype+VNtype:vactype)

> m9<-lm(VNT~dpv+VNtype+vactype+dpv:vactype)

> m10<-lm(VNT~dpv+VNtype+vactype+dpv:VNtype)

> AIC(m4,m6,m7,m8,m9,m10)

|  | df | AIC |
| --- | --- | --- |
| m4 | 5 | 50.2549 |
| m6 | 7 | 53.72209 |
| m7 | 7 | 52.89715 |
| m8 | 13 | 61.13058 |
| m9 | 7 | 52.89715 |
| m10 | 9 | 56.35209 |

> summary(m4)

Call:

lm(formula = VNT ~ dpv + VNtype)

Residuals:

| Min | 1Q | Median | 3Q | Max |
| --- | --- | --- | --- | --- |
| -0.9975 | -0.2475 | 0.0525 | 0.1875 | 0.8025 |

Coefficients:

|  | Estimate | Std. Error | t value | Pr(>|t|) |  |
| --- | --- | --- | --- | --- | --- |
| (Intercept) | 1.5975 | 0.09045 | 17.663 | < 2e-16 | *** |
| dpv21 | 0.735 | 0.09045 | 8.126 | 4.79E-11 | *** |
| VNtypeO3039 | 0.3375 | 0.11077 | 3.047 | 0.00352 | ** |
| VNtypeOManisa | -0.2850 | 0.11077 | 2.573 | 0.01276 | * |

---

Signif. codes: 0 ‘***’ 0.001 ‘**’ 0.01 ‘*’ 0.05 ‘.’ 0.1 ‘ ’ 1

Residual standard error: 0.3503 on 56 degrees of freedom

Multiple R-squared: 0.6356, Adjusted R-squared: 0.6161

F-statistic: 32.56 on 3 and 56 DF, p-value: 2.573e-12

###### linear mixed model #########

> n0<-lmer(VNT~1+(1|animal))

> n1<-lmer(VNT~VNtype+(1|animal))

> n2<-lmer(VNT~vactype+(1|animal))

> n3<-lmer(VNT~dpv+(1|animal))

> AIC(n0,n1,n2,n3)

|  | df | AIC |
| --- | --- | --- |
| n0 | 3 | 99.42130 |
| n1 | 5 | 78.19286 |
| n2 | 6 | 88.33477 |
| n3 | 4 | 81.58129 |

> summary(n1)

Linear mixed model fit by REML ['lmerMod']

Formula: VNT ~ VNtype + (1 | animal)

REML criterion at convergence: 68.2

Scaled residuals:

| Min | 1Q | Median | 3Q | Max |
| --- | --- | --- | --- | --- |
| -1.7625 | -0.6702 | 0.1232 | 0.6607 | 1.8759 |

Random effects:

| Groups Name | Variance | Std.Dev. |
| --- | --- | --- |
| animal (Intercept) | 0.17704 | 0.4208 |
| Residual | 0.08568 | 0.2927 |

Number of obs: 60, groups: animal, 20

Fixed effects:

|  | Estimate | Std. Error | t value |
| --- | --- | --- | --- |
| (Intercept) | 1.965 | 0.11461 | 17.145 |
| VNtype O3039 | 0.3375 | 0.09256 | 3.646 |
| VNtype OManisa | -0.285 | 0.09256 | -3.079 |

Correlation of Fixed Effects:

|  | (Intr) | VN3039 |
| --- | --- | --- |
| VNtype O3039 | -0.404 |  |
| VNtype OManisa | -0.404 | 0.500 |

> n4<-lmer(VNT~VNtype+vactype+(1|animal))

> n5<-lmer(VNT~VNtype+dpv+(1|animal))

> n6<-lmer(VNT~VNtype+vactype+VNtype:vactype+(1|animal))

> n7<-lmer(VNT~VNtype+dpv+VNtype:dpv+(1|animal))

> n8<-lmer(VNT~VNtype+dpv+vactype+(1|animal))

fixed-effect model matrix is rank deficient so dropping 1 column / coefficient

> AIC(n1,n4,n5,n6,n7,n8)

|  | df | AIC |
| --- | --- | --- |
| n1 | 5 | 78.19286 |
| n4 | 8 | 67.10633 |
| n5 | 6 | 60.35285 |
| n6 | 14 | 81.61643 |
| n7 | 8 | 66.98002 |
| n8 | 8 | 67.10633 |

> summary(m5)

Linear mixed model fit by REML ['lmerMod']

Formula: VNT ~ VNtype + dpv + (1 | animal)

REML criterion at convergence: 48.4

Scaled residuals:

| Min | 1Q | Median | 3Q | Max |
| --- | --- | --- | --- | --- |
| -1.81108 | -0.7265 | 0.09234 | 0.53132 | 2.28123 |

Random effects:

| Groups Name | Variance | Std.Dev. |
| --- | --- | --- |
| animal (Intercept) | 0.0384 | 0.196 |
| Residual | 0.08568 | 0.2927 |

Number of obs: 60, groups: animal, 20

Fixed effects:

|  | Estimate | Std. Error | t value |
| --- | --- | --- | --- |
| (Intercept) | 1.5975 | 0.09773 | 16.346 |
| VNtype O3039 | 0.3375 | 0.09256 | 3.646 |
| VNtype OManisa | -0.285 | 0.09256 | -3.079 |
| dpv21 | 0.735 | 0.11572 | 6.351 |

Correlation of Fixed Effects:

|  | (Intr) | VNO3039 | VNOManisa |
| --- | --- | --- | --- |
| VNtype O3039 | -0.474 |  |  |
| VNtype OManisa | -0.474 | 0.500 |  |
| dpv21 | -0.592 | 0.000 | 0.000 |

> detach(dat)

**######## post challenge antibody response ###########**

> data<-read.csv("VNT after challenge.csv",sep=';')

> data$vnt<-ifelse(data$vnt=="<0.3",0,as.numeric(as.character(data$vnt)))

Warning message:

In ifelse(data$vnt == "<0.3", 0, as.numeric(as.character(data$vnt))) :

NAs introduced by coercion

> summary(data)

> attach(data)

> tapply(vnt,animal,length)

> k0<-lmer(vnt~1+(1|animal))

> k1<-lmer(vnt~VNtype+(1|animal))

> k2<-lmer(vnt~vactype+(1|animal))

> k3<-lmer(vnt~prot+(1|animal))

> k4<-lmer(vnt~factor(dpc)+(1|animal))

> AIC(k0,k1,k2,k3,k4)

|  | df | AIC |
| --- | --- | --- |
| k0 | 3 | 2618.974 |
| k1 | 5 | 2618.870 |
| k2 | 7 | 2588.195 |
| k3 | 4 | 2611.739 |
| k4 | 17 | 1348.076 |

> k5<-lmer(vnt~factor(dpc)+VNtype+(1|animal))

> k6<-lmer(vnt~factor(dpc)+vactype+(1|animal))

> k7<-lmer(vnt~factor(dpc)+prot+(1|animal))

> AIC(k4,k5,k6,k7)

|  | df | AIC |
| --- | --- | --- |
| k4 | 17 | 1348.076 |
| k5 | 19 | 1317.413 |
| k6 | 21 | 1317.297 |
| k7 | 18 | 1340.841 |

> summary(k6)

Linear mixed model fit by REML ['lmerMod']

Formula: vnt ~ factor(dpc) + vactype + (1 | animal)

REML criterion at convergence: 1275.3

Scaled residuals:

| Min | 1Q | Median | 3Q | Max |
| --- | --- | --- | --- | --- |
| -4.016 | -0.524 | 0.093 | 0.606 | 3.15 |

Random effects:

| Groups Name | Variance | Std.Dev. |
| --- | --- | --- |
| animal (Intercept) | 0.03201 | 0.1789 |
| Residual | 0.18209 | 0.4267 |

Number of obs: 1035, groups: animal, 23

Fixed effects:

|  | Estimate | Std. Error | t value |
| --- | --- | --- | --- |
| (Intercept) | 2.16981 | 0.09836 | 22.060 |
| factor(dpc)1 | 0.18913 | 0.07265 | 2.603 |
| factor(dpc)2 | 0.27391 | 0.07265 | 3.770 |
| factor(dpc)3 | 0.37609 | 0.07265 | 5.177 |
| factor(dpc)4 | 0.73043 | 0.07265 | 10.054 |
| factor(dpc)5 | 1.09855 | 0.07265 | 15.121 |
| factor(dpc)6 | 1.37609 | 0.07265 | 18.941 |
| factor(dpc)7 | 1.78913 | 0.07265 | 24.627 |
| factor(dpc)11 | 1.86304 | 0.07265 | 25.644 |
| factor(dpc)14 | 1.9413 | 0.07265 | 26.721 |
| factor(dpc)18 | 1.8913 | 0.07265 | 26.033 |
| factor(dpc)21 | 1.8087 | 0.07265 | 24.896 |
| factor(dpc)25 | 1.81522 | 0.07265 | 24.986 |
| factor(dpc)28 | 1.77174 | 0.07265 | 24.387 |
| factor(dpc)31 | 1.72826 | 0.07265 | 23.789 |
| vactype Comb-7 | -0.53733 | 0.1201 | -4.474 |
| vactype Control | -1.49333 | 0.13868 | -10.768 |
| vactype O3039-21 | 0.02622 | 0.1201 | 0.218 |
| vactype O3039-7 | -0.574 | 0.1201 | -4.779 |

Correlation matrix not shown by default, as p = 19 > 12.

Use print(x, correlation=TRUE) or vcov(x) if you need it

> k8<-lmer(vnt~factor(dpc)+VNtype+factor(dpc):VNtype+(1|animal))

> k9<-lmer(vnt~factor(dpc)+vactype+factor(dpc):vactype+(1|animal))

> AIC(k4,k5,k6,k8,k9)

|  | df | AIC |
| --- | --- | --- |
| k4 | 17 | 1348.076 |
| k5 | 19 | 1317.413 |
| k6 | 21 | 1317.297 |
| k8 | 47 | 1370.773 |
| k9 | 77 | 1092.748 |

> summary(k9)

Linear mixed model fit by REML ['lmerMod']

Formula: vnt ~ factor(dpc) + vactype + factor(dpc):vactype + (1 | animal)

REML criterion at convergence: 938.7

Scaled residuals:

| Min | 1Q | Median | 3Q | Max |
| --- | --- | --- | --- | --- |
| -4.8217 | -0.5804 | 0.0193 | 0.5795 | 2.8684 |

Random effects:

| Groups Name | Variance | Std.Dev. |
| --- | --- | --- |
| animal (Intercept) | 0.03337 | 0.1827 |
| Residual | 0.12096 | 0.3478 |

Number of obs: 1035, groups: animal, 23

Fixed effects:

|  | Estimate | Std. Error | t value |
| --- | --- | --- | --- |
| (Intercept) | 2.32E+00 | 1.21E-01 | 19.110 |
| factor(dpc)1 | 1.20E-01 | 1.27E-01 | 0.945 |
| factor(dpc)2 | 1.50E-01 | 1.27E-01 | 1.181 |
| factor(dpc)3 | 2.10E-01 | 1.27E-01 | 1.654 |
| factor(dpc)4 | 2.30E-01 | 1.27E-01 | 1.811 |
| factor(dpc)5 | 6.20E-01 | 1.27E-01 | 4.882 |
| factor(dpc)6 | 9.20E-01 | 1.27E-01 | 7.244 |
| factor(dpc)7 | 1.50E+00 | 1.27E-01 | 11.811 |
| factor(dpc)11 | 1.90E+00 | 1.27E-01 | 14.961 |
| factor(dpc)14 | 1.91E+00 | 1.27E-01 | 15.040 |
| factor(dpc)18 | 1.79E+00 | 1.27E-01 | 14.095 |
| factor(dpc)21 | 1.78E+00 | 1.27E-01 | 14.016 |
| factor(dpc)25 | 1.76E+00 | 1.27E-01 | 13.859 |
| factor(dpc)28 | 1.78E+00 | 1.27E-01 | 14.016 |
| factor(dpc)31 | 1.73E+00 | 1.27E-01 | 13.622 |
| vactype Comb-7 | -7.70E-01 | 1.72E-01 | -4.485 |
| vactype Control | -2.20E+00 | 1.98E-01 | -11.114 |
| vactype O3039-21 | 6.00E-02 | 1.72E-01 | 0.349 |
| vactype O3039-7 | -6.40E-01 | 1.72E-01 | -3.728 |
| factor(dpc)1:vactype Comb-7 | 3.00E-01 | 1.80E-01 | 1.670 |
| factor(dpc)2:vactype Comb-7 | 4.30E-01 | 1.80E-01 | 2.394 |
| factor(dpc)3:vactype Comb-7 | 5.20E-01 | 1.80E-01 | 2.895 |
| factor(dpc)4:vactype Comb-7 | 9.90E-01 | 1.80E-01 | 5.512 |
| factor(dpc)5:vactype Comb-7 | 7.30E-01 | 1.80E-01 | 4.065 |
| factor(dpc)6:vactype Comb-7 | 5.70E-01 | 1.80E-01 | 3.174 |
| factor(dpc)7:vactype Comb-7 | 3.80E-01 | 1.80E-01 | 2.116 |
| factor(dpc)11:vactype Comb-7 | -1.10E-01 | 1.80E-01 | -0.612 |
| factor(dpc)14:vactype Comb-7 | -8.00E-02 | 1.80E-01 | -0.445 |
| factor(dpc)18:vactype Comb-7 | 3.00E-02 | 1.80E-01 | 0.167 |
| factor(dpc)21:vactype Comb-7 | -4.00E-02 | 1.80E-01 | -0.223 |
| factor(dpc)25:vactype Comb-7 | -1.00E-02 | 1.80E-01 | -0.056 |
| factor(dpc)28:vactype Comb-7 | -9.00E-02 | 1.80E-01 | -0.501 |
| factor(dpc)31:vactype Comb-7 | -1.30E-01 | 1.80E-01 | -0.724 |
| factor(dpc)1:vactype Control | -1.37E-01 | 2.07E-01 | -0.659 |
| factor(dpc)2:vactype Control | -5.00E-02 | 2.07E-01 | -0.241 |
| factor(dpc)3:vactype Control | -4.33E-02 | 2.07E-01 | -0.209 |
| factor(dpc)4:vactype Control | 7.20E-01 | 2.07E-01 | 3.472 |
| factor(dpc)5:vactype Control | 1.56E+00 | 2.07E-01 | 7.538 |
| factor(dpc)6:vactype Control | 1.65E+00 | 2.07E-01 | 7.940 |
| factor(dpc)7:vactype Control | 1.15E+00 | 2.07E-01 | 5.545 |
| factor(dpc)11:vactype Control | 8.33E-01 | 2.07E-01 | 4.018 |
| factor(dpc)14:vactype Control | 9.07E-01 | 2.07E-01 | 4.372 |
| factor(dpc)18:vactype Control | 1.01E+00 | 2.07E-01 | 4.870 |
| factor(dpc)21:vactype Control | 8.87E-01 | 2.07E-01 | 4.275 |
| factor(dpc)25:vactype Control | 8.23E-01 | 2.07E-01 | 3.970 |
| factor(dpc)28:vactype Control | 6.20E-01 | 2.07E-01 | 2.990 |
| factor(dpc)31:vactype Control | 7.20E-01 | 2.07E-01 | 3.472 |
| factor(dpc)1:vactype O3039-21 | -1.20E-01 | 1.80E-01 | -0.668 |
| factor(dpc)2:vactype O3039-21 | -1.10E-01 | 1.80E-01 | -0.612 |
| factor(dpc)3:vactype O3039-21 | -1.00E-01 | 1.80E-01 | -0.557 |
| factor(dpc)4:vactype O3039-21 | -5.00E-02 | 1.80E-01 | -0.278 |
| factor(dpc)5:vactype O3039-21 | -7.67E-02 | 1.80E-01 | -0.427 |
| factor(dpc)6:vactype O3039-21 | 5.00E-02 | 1.80E-01 | 0.278 |
| factor(dpc)7:vactype O3039-21 | 2.40E-01 | 1.80E-01 | 1.336 |
| factor(dpc)11:vactype O3039-21 | -2.60E-01 | 1.80E-01 | -1.448 |
| factor(dpc)14:vactype O3039-21 | -1.00E-01 | 1.80E-01 | -0.557 |
| factor(dpc)18:vactype O3039-21 | -3.00E-02 | 1.80E-01 | -0.167 |
| factor(dpc)21:vactype O3039-21 | -9.00E-02 | 1.80E-01 | -0.501 |
| factor(dpc)25:vactype O3039-21 | 9.00E-02 | 1.80E-01 | 0.501 |
| factor(dpc)28:vactype O3039-21 | -7.21E-13 | 1.80E-01 | 0.000 |
| factor(dpc)31:vactype O3039-21 | 5.00E-02 | 1.80E-01 | 0.278 |
| factor(dpc)1:vactype O3039-7 | 2.20E-01 | 1.80E-01 | 1.225 |
| factor(dpc)2:vactype O3039-7 | 2.80E-01 | 1.80E-01 | 1.559 |
| factor(dpc)3:vactype O3039-7 | 3.70E-01 | 1.80E-01 | 2.060 |
| factor(dpc)4:vactype O3039-7 | 9.30E-01 | 1.80E-01 | 5.178 |
| factor(dpc)5:vactype O3039-7 | 6.10E-01 | 1.80E-01 | 3.396 |
| factor(dpc)6:vactype O3039-7 | 4.90E-01 | 1.80E-01 | 2.728 |
| factor(dpc)7:vactype O3039-7 | 2.00E-02 | 1.80E-01 | 0.111 |
| factor(dpc)11:vactype O3039-7 | -3.00E-01 | 1.80E-01 | -1.670 |
| factor(dpc)14:vactype O3039-7 | -2.20E-01 | 1.80E-01 | -1.225 |
| factor(dpc)18:vactype O3039-7 | -1.40E-01 | 1.80E-01 | -0.780 |
| factor(dpc)21:vactype O3039-7 | -2.70E-01 | 1.80E-01 | -1.503 |
| factor(dpc)25:vactype O3039-7 | -3.20E-01 | 1.80E-01 | -1.782 |
| factor(dpc)28:vactype O3039-7 | -3.20E-01 | 1.80E-01 | -1.782 |
| factor(dpc)31:vactype O3039-7 | -3.60E-01 | 1.80E-01 | -2.004 |

Correlation matrix not shown by default, as p = 75 > 12.

Use print(x, correlation=TRUE) or vcov(x) if you need it

> k10<-lmer(vnt~factor(dpc)+vactype+factor(dpc):vactype+VNtype+(1|animal))

> AIC(k9,k10)

|  | df | AIC |
| --- | --- | --- |
| k9 | 77 | 1092.748 |
| k10 | 79 | 1039.240 |

> summary(k10)

Linear mixed model fit by REML ['lmerMod']

Formula: vnt ~ factor(dpc) + vactype + factor(dpc):vactype + VNtype + (1 | animal)

REML criterion at convergence: 881.2

Scaled residuals:

| Min | 1Q | Median | 3Q | Max |
| --- | --- | --- | --- | --- |
| -5.0949 | -0.5652 | 0.0282 | 0.5511 | 2.7938 |

Random effects:

| Groups Name | Variance | Std.Dev. |
| --- | --- | --- |
| animal (Intercept) | 3.36E-02 | 1.83E-01 |
| Residual | 0.11268 | 0.3357 |

Number of obs: 1035, groups: animal, 23

Fixed effects:

|  | Estimate | Std. Error | t value |
| --- | --- | --- | --- |
| (Intercept) | 2.35E+00 | 1.20E-01 | 19.581 |
| factor(dpc)1 | 1.20E-01 | 1.23E-01 | 0.979 |
| factor(dpc)2 | 1.50E-01 | 1.23E-01 | 1.224 |
| factor(dpc)3 | 2.10E-01 | 1.23E-01 | 1.713 |
| factor(dpc)4 | 2.30E-01 | 1.23E-01 | 1.876 |
| factor(dpc)5 | 6.20E-01 | 1.23E-01 | 5.058 |
| factor(dpc)6 | 9.20E-01 | 1.23E-01 | 7.506 |
| factor(dpc)7 | 1.50E+00 | 1.23E-01 | 12.238 |
| factor(dpc)11 | 1.90E+00 | 1.23E-01 | 15.501 |
| factor(dpc)14 | 1.91E+00 | 1.23E-01 | 15.582 |
| factor(dpc)18 | 1.79E+00 | 1.23E-01 | 14.603 |
| factor(dpc)21 | 1.78E+00 | 1.23E-01 | 14.522 |
| factor(dpc)25 | 1.76E+00 | 1.23E-01 | 14.359 |
| factor(dpc)28 | 1.78E+00 | 1.23E-01 | 14.522 |
| factor(dpc)31 | 1.73E+00 | 1.23E-01 | 14.114 |
| vactype Comb-7 | -7.70E-01 | 1.69E-01 | -4.565 |
| vactype Control - | 2.20E+00 | 1.95E-01 | -11.314 |
| vactype O3039-21 | 6.00E-02 | 1.69E-01 | 0.356 |
| vactype O3039-7 | -6.40E-01 | 1.69E-01 | -3.795 |
| VNtype OAlg - | 1.54E-01 | 2.56E-02 | -6.005 |
| VNtype OManisa | 5.45E-02 | 2.56E-02 | 2.132 |
| factor(dpc)1:vactype Comb-7 | 3.00E-01 | 1.73E-01 | 1.731 |
| factor(dpc)2:vactype Comb-7 | 4.30E-01 | 1.73E-01 | 2.481 |
| factor(dpc)3:vactype Comb-7 | 5.20E-01 | 1.73E-01 | 3.000 |
| factor(dpc)4:vactype Comb-7 | 9.90E-01 | 1.73E-01 | 5.711 |
| factor(dpc)5:vactype Comb-7 | 7.30E-01 | 1.73E-01 | 4.211 |
| factor(dpc)6:vactype Comb-7 | 5.70E-01 | 1.73E-01 | 3.288 |
| factor(dpc)7:vactype Comb-7 | 3.80E-01 | 1.73E-01 | 2.192 |
| factor(dpc)11:vactype Comb-7 | -1.10E-01 | 1.73E-01 | -0.635 |
| factor(dpc)14:vactype Comb-7 | -8.00E-02 | 1.73E-01 | -0.462 |
| factor(dpc)18:vactype Comb-7 | 3.00E-02 | 1.73E-01 | 0.173 |
| factor(dpc)21:vactype Comb-7 | -4.00E-02 | 1.73E-01 | -0.231 |
| factor(dpc)25:vactype Comb-7 | -1.00E-02 | 1.73E-01 | -0.058 |
| factor(dpc)28:vactype Comb-7 | -9.00E-02 | 1.73E-01 | -0.519 |
| factor(dpc)31:vactype Comb-7 | -1.30E-01 | 1.73E-01 | -0.750 |
| factor(dpc)1:vactype Control | -1.37E-01 | 2.00E-01 | -0.683 |
| factor(dpc)2:vactype Control | -5.00E-02 | 2.00E-01 | -0.250 |
| factor(dpc)3:vactype Control | -4.33E-02 | 2.00E-01 | -0.216 |
| factor(dpc)4:vactype Control | 7.20E-01 | 2.00E-01 | 3.597 |
| factor(dpc)5:vactype Control | 1.56E+00 | 2.00E-01 | 7.810 |
| factor(dpc)6:vactype Control | 1.65E+00 | 2.00E-01 | 8.227 |
| factor(dpc)7:vactype Control | 1.15E+00 | 2.00E-01 | 5.745 |
| factor(dpc)11:vactype Control | 8.33E-01 | 2.00E-01 | 4.163 |
| factor(dpc)14:vactype Control | 9.07E-01 | 2.00E-01 | 4.530 |
| factor(dpc)18:vactype Control | 1.01E+00 | 2.00E-01 | 5.046 |
| factor(dpc)21:vactype Control | 8.87E-01 | 2.00E-01 | 4.430 |
| factor(dpc)25:vactype Control | 8.23E-01 | 2.00E-01 | 4.113 |
| factor(dpc)28:vactype Control | 6.20E-01 | 2.00E-01 | 3.097 |
| factor(dpc)31:vactype Control | 7.20E-01 | 2.00E-01 | 3.597 |
| factor(dpc)1:vactype O3039-21 | -1.20E-01 | 1.73E-01 | -0.692 |
| factor(dpc)2:vactype O3039-21 | -1.10E-01 | 1.73E-01 | -0.635 |
| factor(dpc)3:vactype O3039-21 | -1.00E-01 | 1.73E-01 | -0.577 |
| factor(dpc)4:vactype O3039-21 | -5.00E-02 | 1.73E-01 | -0.288 |
| factor(dpc)5:vactype O3039-21 | -7.67E-02 | 1.73E-01 | -0.442 |
| factor(dpc)6:vactype O3039-21 | 5.00E-02 | 1.73E-01 | 0.288 |
| factor(dpc)7:vactype O3039-21 | 2.40E-01 | 1.73E-01 | 1.385 |
| factor(dpc)11:vactype O3039-21 | -2.60E-01 | 1.73E-01 | -1.500 |
| factor(dpc)14:vactype O3039-21 | -1.00E-01 | 1.73E-01 | -0.577 |
| factor(dpc)18:vactype O3039-21 | -3.00E-02 | 1.73E-01 | -0.173 |
| factor(dpc)21:vactype O3039-21 | -9.00E-02 | 1.73E-01 | -0.519 |
| factor(dpc)25:vactype O3039-21 | 9.00E-02 | 1.73E-01 | 0.519 |
| factor(dpc)28:vactype O3039-21 | -7.85E-13 | 1.73E-01 | 0.000 |
| factor(dpc)31:vactype O3039-21 | 5.00E-02 | 1.73E-01 | 0.288 |
| factor(dpc)1:vactype O3039-7 | 2.20E-01 | 1.73E-01 | 1.269 |
| factor(dpc)2:vactype O3039-7 | 2.80E-01 | 1.73E-01 | 1.615 |
| factor(dpc)3:vactype O3039-7 | 3.70E-01 | 1.73E-01 | 2.134 |
| factor(dpc)4:vactype O3039-7 | 9.30E-01 | 1.73E-01 | 5.365 |
| factor(dpc)5:vactype O3039-7 | 6.10E-01 | 1.73E-01 | 3.519 |
| factor(dpc)6:vactype O3039-7 | 4.90E-01 | 1.73E-01 | 2.827 |
| factor(dpc)7:vactype O3039-7 | 2.00E-02 | 1.73E-01 | 0.115 |
| factor(dpc)11:vactype O3039-7 | -3.00E-01 | 1.73E-01 | -1.731 |
| factor(dpc)14:vactype O3039-7 | -2.20E-01 | 1.73E-01 | -1.269 |
| factor(dpc)18:vactype O3039-7 | -1.40E-01 | 1.73E-01 | -0.808 |
| factor(dpc)21:vactype O3039-7 | -2.70E-01 | 1.73E-01 | -1.558 |
| factor(dpc)25:vactype O3039-7 | -3.20E-01 | 1.73E-01 | -1.846 |
| factor(dpc)28:vactype O3039-7 | -3.20E-01 | 1.73E-01 | -1.846 |
| factor(dpc)31:vactype O3039-7 | -3.60E-01 | 1.73E-01 | -2.077 |

Correlation matrix not shown by default, as p = 77 > 12.

Use print(x, correlation=TRUE) or vcov(x) if you need it

> k11<-lmer(vnt~factor(dpc)+vactype+factor(dpc):vactype+VNtype+factor(dpc):VNtype+(1|animal))

> k12<-lmer(vnt~factor(dpc)+vactype+factor(dpc):vactype+VNtype+vactype:VNtype+(1|animal))

> AIC(k10,k11,k12)

|  | df | AIC |
| --- | --- | --- |
| k10 | 79 | 1039.2397 |
| k11 | 107 | 1066.0652 |
| k12 | 87 | 833.8429 |

> summary(k12)

Linear mixed model fit by REML ['lmerMod']

Formula: vnt ~ factor(dpc) + vactype + factor(dpc):vactype + VNtype + vactype:VNtype + (1 | animal)

REML criterion at convergence: 659.8

Scaled residuals:

| Min | 1Q | Median | 3Q | Max |
| --- | --- | --- | --- | --- |
| -5.5727 | -0.5326 | 0.0089 | 0.5549 | 2.7034 |

Random effects:

Groups Name Variance Std.Dev.

animal (Intercept) 0.03413 0.1847

Residual 0.08689 0.2948

Number of obs: 1035, groups: animal, 23

Fixed effects:

|  | Estimate | Std. Error | t value |
| --- | --- | --- | --- |
| (Intercept) | 2.23E+00 | 1.16E-01 | 19.242 |
| factor(dpc)1 | 1.20E-01 | 1.08E-01 | 1.115 |
| factor(dpc)2 | 1.50E-01 | 1.08E-01 | 1.394 |
| factor(dpc)3 | 2.10E-01 | 1.08E-01 | 1.951 |
| factor(dpc)4 | 2.30E-01 | 1.08E-01 | 2.137 |
| factor(dpc)5 | 6.20E-01 | 1.08E-01 | 5.760 |
| factor(dpc)6 | 9.20E-01 | 1.08E-01 | 8.547 |
| factor(dpc)7 | 1.50E+00 | 1.08E-01 | 13.936 |
| factor(dpc)11 | 1.90E+00 | 1.08E-01 | 17.652 |
| factor(dpc)14 | 1.91E+00 | 1.08E-01 | 17.745 |
| factor(dpc)18 | 1.79E+00 | 1.08E-01 | 16.630 |
| factor(dpc)21 | 1.78E+00 | 1.08E-01 | 16.537 |
| factor(dpc)25 | 1.76E+00 | 1.08E-01 | 16.351 |
| factor(dpc)28 | 1.78E+00 | 1.08E-01 | 16.537 |
| factor(dpc)31 | 1.73E+00 | 1.08E-01 | 16.073 |
| vactype Comb-7 | -4.43E-01 | 1.64E-01 | -2.705 |
| vactype Control | -2.41E+00 | 1.89E-01 | -12.771 |
| vactype O3039-21 | 1.18E-01 | 1.64E-01 | 0.720 |
| vactype O3039-7 | -3.18E-01 | 1.64E-01 | -1.943 |
| VNtype OAlg | 1.80E-01 | 4.81E-02 | 3.739 |
| VNtype OManisa | 1.00E-01 | 4.81E-02 | 2.077 |
| factor(dpc)1:vactype Comb-7 | 3.00E-01 | 1.52E-01 | 1.971 |
| factor(dpc)2:vactype Comb-7 | 4.30E-01 | 1.52E-01 | 2.825 |
| factor(dpc)3:vactype Comb-7 | 5.20E-01 | 1.52E-01 | 3.416 |
| factor(dpc)4:vactype Comb-7 | 9.90E-01 | 1.52E-01 | 6.504 |
| factor(dpc)5:vactype Comb-7 | 7.30E-01 | 1.52E-01 | 4.796 |
| factor(dpc)6:vactype Comb-7 | 5.70E-01 | 1.52E-01 | 3.745 |
| factor(dpc)7:vactype Comb-7 | 3.80E-01 | 1.52E-01 | 2.496 |
| factor(dpc)11:vactype Comb-7 | -1.10E-01 | 1.52E-01 | -0.723 |
| factor(dpc)14:vactype Comb-7 | -8.00E-02 | 1.52E-01 | -0.526 |
| factor(dpc)18:vactype Comb-7 | 3.00E-02 | 1.52E-01 | 0.197 |
| factor(dpc)21:vactype Comb-7 | -4.00E-02 | 1.52E-01 | -0.263 |
| factor(dpc)25:vactype Comb-7 | -1.00E-02 | 1.52E-01 | -0.066 |
| factor(dpc)28:vactype Comb-7 | -9.00E-02 | 1.52E-01 | -0.591 |
| factor(dpc)31:vactype Comb-7 | -1.30E-01 | 1.52E-01 | -0.854 |
| factor(dpc)1:vactype Control | -1.37E-01 | 1.76E-01 | -0.778 |
| factor(dpc)2:vactype Control | -5.00E-02 | 1.76E-01 | -0.284 |
| factor(dpc)3:vactype Control | -4.33E-02 | 1.76E-01 | -0.247 |
| factor(dpc)4:vactype Control | 7.20E-01 | 1.76E-01 | 4.096 |
| factor(dpc)5:vactype Control | 1.56E+00 | 1.76E-01 | 8.894 |
| factor(dpc)6:vactype Control | 1.65E+00 | 1.76E-01 | 9.368 |
| factor(dpc)7:vactype Control | 1.15E+00 | 1.76E-01 | 6.543 |
| factor(dpc)11:vactype Control | 8.33E-01 | 1.76E-01 | 4.741 |
| factor(dpc)14:vactype Control | 9.07E-01 | 1.76E-01 | 5.158 |
| factor(dpc)18:vactype Control | 1.01E+00 | 1.76E-01 | 5.746 |
| factor(dpc)21:vactype Control | 8.87E-01 | 1.76E-01 | 5.044 |
| factor(dpc)25:vactype Control | 8.23E-01 | 1.76E-01 | 4.684 |
| factor(dpc)28:vactype Control | 6.20E-01 | 1.76E-01 | 3.527 |
| factor(dpc)31:vactype Control | 7.20E-01 | 1.76E-01 | 4.096 |
| factor(dpc)1:vactype O3039-21 | -1.20E-01 | 1.52E-01 | -0.788 |
| factor(dpc)2:vactype O3039-21 | -1.10E-01 | 1.52E-01 | -0.723 |
| factor(dpc)3:vactype O3039-21 | -1.00E-01 | 1.52E-01 | -0.657 |
| factor(dpc)4:vactype O3039-21 | -5.00E-02 | 1.52E-01 | -0.328 |
| factor(dpc)5:vactype O3039-21 | -7.67E-02 | 1.52E-01 | -0.504 |
| factor(dpc)6:vactype O3039-21 | 5.00E-02 | 1.52E-01 | 0.328 |
| factor(dpc)7:vactype O3039-21 | 2.40E-01 | 1.52E-01 | 1.577 |
| factor(dpc)11:vactype O3039-21 | -2.60E-01 | 1.52E-01 | -1.708 |
| factor(dpc)14:vactype O3039-21 | -1.00E-01 | 1.52E-01 | -0.657 |
| factor(dpc)18:vactype O3039-21 | -3.00E-02 | 1.52E-01 | -0.197 |
| factor(dpc)21:vactype O3039-21 | -9.00E-02 | 1.52E-01 | -0.591 |
| factor(dpc)25:vactype O3039-21 | 9.00E-02 | 1.52E-01 | 0.591 |
| factor(dpc)28:vactype O3039-21 | -5.87E-13 | 1.52E-01 | 0.000 |
| factor(dpc)31:vactype O3039-21 | 5.00E-02 | 1.52E-01 | 0.328 |
| factor(dpc)1:vactype O3039-7 | 2.20E-01 | 1.52E-01 | 1.445 |
| factor(dpc)2:vactype O3039-7 | 2.80E-01 | 1.52E-01 | 1.839 |
| factor(dpc)3:vactype O3039-7 | 3.70E-01 | 1.52E-01 | 2.431 |
| factor(dpc)4:vactype O3039-7 | 9.30E-01 | 1.52E-01 | 6.110 |
| factor(dpc)5:vactype O3039-7 | 6.10E-01 | 1.52E-01 | 4.007 |
| factor(dpc)6:vactype O3039-7 | 4.90E-01 | 1.52E-01 | 3.219 |
| factor(dpc)7:vactype O3039-7 | 2.00E-02 | 1.52E-01 | 0.131 |
| factor(dpc)11:vactype O3039-7 | -3.00E-01 | 1.52E-01 | -1.971 |
| factor(dpc)14:vactype O3039-7 | -2.20E-01 | 1.52E-01 | -1.445 |
| factor(dpc)18:vactype O3039-7 | -1.40E-01 | 1.52E-01 | -0.920 |
| factor(dpc)21:vactype O3039-7 | -2.70E-01 | 1.52E-01 | -1.774 |
| factor(dpc)25:vactype O3039-7 | -3.20E-01 | 1.52E-01 | -2.102 |
| factor(dpc)28:vactype O3039-7 | -3.20E-01 | 1.52E-01 | -2.102 |
| factor(dpc)31:vactype O3039-7 | -3.60E-01 | 1.52E-01 | -2.365 |
| vactype Comb-7:VNtype OAlg | -7.12E-01 | 6.81E-02 | -10.459 |
| vactype Control:VNtype OAlg | 5.00E-02 | 7.86E-02 | 0.636 |
| vactype O3039-21:VNtype OAlg | -1.76E-01 | 6.81E-02 | -2.585 |
| vactype O3039-7:VNtype OAlg | -6.76E-01 | 6.81E-02 | -9.930 |
| vactype Comb-7:VNtype OManisa | -2.70E-01 | 6.81E-02 | -3.966 |
| vactype Control:VNtype OManisa | 5.80E-01 | 7.86E-02 | 7.379 |
| vactype O3039-21:VNtype OManisa | 2.67E-03 | 6.81E-02 | 0.039 |
| vactype O3039-7:VNtype OManisa | -2.90E-01 | 6.81E-02 | -4.260 |

Correlation matrix not shown by default, as p = 85 > 12.

Use print(x, correlation=TRUE) or vcov(x) if you need it

**######### NSP antibodies ###########**

**############ NSP response between groups ##########**

> data<-read.csv('LVZ194.csv',sep=';')

> table(paste(vaccine,day),group)

> tapply(nsp0,group,summary)

> summary(aov(nsp0~group))

|  | Df | Sum Sq | Mean Sq | F value | Pr(>F) |
| --- | --- | --- | --- | --- | --- |
| group | 4 | 408.3 | 102.08 | 1.353 | 0.289 |
| Residuals | 18 | 1358.4 | 75.47 | ---- |  |

> tapply(nsp5,group,summary)

> summary(aov(nsp5~group))

|  | Df | Sum Sq | Mean Sq | F value | Pr(>F) |
| --- | --- | --- | --- | --- | --- |
| group | 4 | 6.41E+02 | 160.34 | 2.138 | 0.118 |
| Residuals | 18 | 1349.7 | 74.98 |  |  |

> tapply(nsp11,group,summary)

> summary(aov(nsp11~group))

|  | Df | Sum Sq | Mean Sq | F value | Pr(>F) |  |
| --- | --- | --- | --- | --- | --- | --- |
| group | 4 | 4.12E+02 | 102.9 | 3.397 | 0.0309 | * |
| Residuals | 18 | 545.4 | 30.3 | ---- |  |  |

Signif. codes: 0 ‘***’ 0.001 ‘**’ 0.01 ‘*’ 0.05 ‘.’ 0.1 ‘ ’ 1

> pairwise.t.test(nsp11,group) # No pairwise difference

Pairwise comparisons using t tests with pooled SD

data: nsp11 and group

|  | 1 | 2 | 3 | 4 |
| --- | --- | --- | --- | --- |
| 2 | 1.000 | - | - | - |
| 3 | 0.578 | 0.998 | - | - |
| 4 | 0.998 | 0.494 | 0.053 | - |
| 5 | 0.998 | 0.578 | 0.100 | 1.000 |

P value adjustment method: holm

> tapply(nsp14,group,summary)

> summary(aov(nsp14~group))

|  | Df | Sum Sq | Mean Sq | F value | Pr(>F) |  |
| --- | --- | --- | --- | --- | --- | --- |
| group | 4 | 544 | 136 | 4.583 | 0.00997 | ** |
| Residuals | 18 | 534.2 | 29.68 | --- |  |  |

Signif. codes: 0 ‘***’ 0.001 ‘**’ 0.01 ‘*’ 0.05 ‘.’ 0.1 ‘ ’ 1

> pairwise.t.test(nsp14,group)

Pairwise comparisons using t tests with pooled SD

data: nsp14 and group

|  | 1 | 2 | 3 | 4 |
| --- | --- | --- | --- | --- |
| 2 | 1.000 | - | - | - |
| 3 | 0.109 | 0.527 | - | - |
| 4 | 1.000 | 0.482 | 0.016 | - |
| 5 | 1.000 | 0.527 | 0.033 | 1.000 |

P value adjustment method: holm

> tapply(nsp21,group,summary)

> summary(aov(nsp21~group))

|  | Df | Sum Sq | Mean Sq | F value | Pr(>F) |  |
| --- | --- | --- | --- | --- | --- | --- |
| group | 4 | 343.7 | 85.94 | 4.597 | 0.00984 | ** |
| Residuals | 18 | 336.5 | 18.7 | --- |  |  |

Signif. codes: 0 ‘***’ 0.001 ‘**’ 0.01 ‘*’ 0.05 ‘.’ 0.1 ‘ ’ 1

> pairwise.t.test(nsp21,group) # No pairwise difference

Pairwise comparisons using t tests with pooled SD

data: nsp21 and group

|  | 1 | 2 | 3 | 4 |
| --- | --- | --- | --- | --- |
| 2 | 0.673 | - | - | - |
| 3 | 0.602 | 1.000 | - | - |
| 4 | 0.673 | 0.066 | 0.051 | - |
| 5 | 0.673 | 0.076 | 0.066 | 1.000 |

P value adjustment method: holm

> tapply(nsp28,group,summary)

> summary(aov(nsp28~group))

|  | Df | Sum Sq | Mean Sq | F value | Pr(>F) |  |
| --- | --- | --- | --- | --- | --- | --- |
| group | 4 | 200.6 | 50.14 | 6.128 | 0.00271 | ** |
| Residuals | 18 | 147.3 | 8.18 | --- |  |  |

Signif. codes: 0 ‘***’ 0.001 ‘**’ 0.01 ‘*’ 0.05 ‘.’ 0.1 ‘ ’ 1

> pairwise.t.test(nsp28,group)

Pairwise comparisons using t tests with pooled SD

data: nsp28 and group

|  | 1 | 2 | 3 | 4 |
| --- | --- | --- | --- | --- |
| 2 | 0.213 | - | - | - |
| 3 | 0.688 | 0.628 | - | - |
| 4 | 0.576 | 0.012 | 0.156 | - |
| 5 | 0.213 | 0.006 | 0.058 | 0.688 |

P value adjustment method: holm

> tapply(nsp33,group,summary)

> summary(aov(nsp33~group))

Df Sum Sq Mean Sq F value Pr(>F)

group 4 112.17 28.041 6.474 0.00207 **

Residuals 18 77.96 4.331

---

Signif. codes: 0 ‘***’ 0.001 ‘**’ 0.01 ‘*’ 0.05 ‘.’ 0.1 ‘ ’ 1

> pairwise.t.test(nsp33,group)

Pairwise comparisons using t tests with pooled SD

data: nsp33 and group

|  | 1 | 2 | 3 | 4 |
| --- | --- | --- | --- | --- |
| 2 | 0.0938 | - | - | - |
| 3 | 0.8397 | 0.0689 | - | - |
| 4 | 0.7592 | 0.0060 | 0.7867 | - |
| 5 | 0.2972 | 0.0029 | 0.3489 | 0.7867 |

P value adjustment method: holm

**> ############ NSP response between vaccines ##########**

> tapply(nsp0,vaccine,summary)

> summary(aov(nsp0~vaccine))

|  | Df | Sum Sq | Mean Sq | F value | Pr(>F) |
| --- | --- | --- | --- | --- | --- |
| vaccine | 2 | 55.700 | 27.84 | 0.325 | 0.726 |
| Residuals | 20 | 1711.000 | 85.55 |  |  |

> tapply(nsp5,vaccine,summary)

> summary(aov(nsp5~vaccine))

|  | Df | Sum Sq | Mean Sq | F value | Pr(>F) |
| --- | --- | --- | --- | --- | --- |
| vaccine | 2 | 121.7 | 60.87 | 0.651 | 0.532 |
| Residuals | 20 | 1869.3 | 93.47 |  |  |

> tapply(nsp11,vaccine,summary)

> summary(aov(nsp11~vaccine))

|  | Df | Sum Sq | Mean Sq | F value | Pr(>F) |
| --- | --- | --- | --- | --- | --- |
| vaccine | 2 | 189 | 94.5 | 2.46 | 0.111 |
| Residuals | 20 | 768.1 | 38.41 |  |  |

> tapply(nsp14,vaccine,summary)

> summary(aov(nsp14~vaccine))

|  | Df | Sum Sq | Mean Sq | F value | Pr(>F) |
| --- | --- | --- | --- | --- | --- |
| vaccine | 2 | 210.7 | 105.36 | 2.429 | 0.114 |
| Residuals | 20 | 867.5 | 43.37 |  |  |

> tapply(nsp21,vaccine,summary)

> summary(aov(nsp21~vaccine))

|  | Df | Sum Sq | Mean Sq | F value | Pr(>F) |
| --- | --- | --- | --- | --- | --- |
| vaccine | 2 | 116.6 | 58.28 | 2.068 | 0.153 |
| Residuals | 20 | 563.7 | 28.18 |  |  |

> tapply(nsp28,vaccine,summary)

> summary(aov(nsp28~vaccine))

|  | Df | Sum Sq | Mean Sq | F value | Pr(>F) |
| --- | --- | --- | --- | --- | --- |
| vaccine | 2 | 74.63 | 37.31 | 2.731 | 0.894 |
| Residuals | 20 | 273.23 | 13.66 | --- |  |

Signif. codes: 0 ‘***’ 0.001 ‘**’ 0.01 ‘*’ 0.05 ‘.’ 0.1 ‘ ’ 1

> tapply(nsp33,vaccine,summary)

> summary(aov(nsp33~vaccine))

|  | Df | Sum Sq | Mean Sq | F value | Pr(>F) |
| --- | --- | --- | --- | --- | --- |
| vaccine | 2 | 39 | 19.501 | 2.581 | 0.101 |
| Residuals | 20 | 151.1 | 7.556 |  |  |

**> ############ NSP response between day of challenge ##########**

> tapply(nsp0,day,summary)

> summary(aov(nsp0~day))

|  | Df | Sum Sq | Mean Sq | F value | Pr(>F) |
| --- | --- | --- | --- | --- | --- |
| day | 2 | 362.1 | 181.06 | 2.578 | 0.101 |
| Residuals | 20 | 1404.6 | 70.23 |  |  |

> tapply(nsp5,day,summary)

> summary(aov(nsp5~day))

|  | Df | Sum Sq | Mean Sq | F value | Pr(>F) |  |
| --- | --- | --- | --- | --- | --- | --- |
| day | 2 | 526.6 | 263.31 | 3.596 | 0.0463 | * |
| Residuals | 20 | 1464.5 | 73.22 | ---- |  |  |

Signif. codes: 0 ‘***’ 0.001 ‘**’ 0.01 ‘*’ 0.05 ‘.’ 0.1 ‘ ’ 1

> pairwise.t.test(nsp5,day) # No pairwise difference

Pairwise comparisons using t tests with pooled SD

data: nsp5 and day

|  | 21 | 7 |
| --- | --- | --- |
| 7 | 0.07 | - |
| Control | 0.87 | 0.16 |

P value adjustment method: holm

> tapply(nsp11,day,summary)

> summary(aov(nsp11~day))

|  | Df | Sum Sq | Mean Sq | F value | Pr(>F) |
| --- | --- | --- | --- | --- | --- |
| day | 2 | 94 | 46.99 | 1.089 | 0.356 |
| Residuals | 20 | 863.1 | 43.16 |  |  |

> tapply(nsp14,day,summary)

> summary(aov(nsp14~day))

|  | Df | Sum Sq | Mean Sq | F value | Pr(>F) |
| --- | --- | --- | --- | --- | --- |
| day | 2.00 | 109.70 | 54.83 | 1.13 | 0.342 |
| Residuals | 20.00 | 968.50 | 48.43 |  |  |

> pairwise.t.test(nsp14,day)

Pairwise comparisons using t tests with pooled SD

data: nsp14 and day

|  | 21 | 7 |
| --- | --- | --- |
| 7 | 0.66 | - |
| control | 0.49 | 0.45 |

P value adjustment method: holm

> tapply(nsp21,day,summary)

> summary(aov(nsp21~day))

|  | Df | Sum Sq | Mean Sq | F value | Pr(>F) |
| --- | --- | --- | --- | --- | --- |
| day | 2.00 | 107.50 | 53.76 | 1.88 | 0.179 |
| Residuals | 20.00 | 572.70 | 28.64 |  |  |

> pairwise.t.test(nsp21,day)

Pairwise comparisons using t tests with pooled SD

data: nsp21 and day

|  | 21 | 7 |
| --- | --- | --- |
| 7 | 0.47 | - |
| control | 0.20 | 0.33 |

P value adjustment method: holm

> tapply(nsp28,day,summary)

> summary(aov(nsp28~day))

|  | Df | Sum Sq | Mean Sq | F value | Pr(>F) |  |
| --- | --- | --- | --- | --- | --- | --- |
| day | 2 | 107.2 | 53.59 | 4.453 | 0.0252 | * |
| Residuals | 20 | 240.7 | 12.03 | ---- |  |  |

Signif. codes: 0 ‘***’ 0.001 ‘**’ 0.01 ‘*’ 0.05 ‘.’ 0.1 ‘ ’ 1

> pairwise.t.test(nsp28,day)

Pairwise comparisons using t tests with pooled SD

data: nsp28 and day

|  | 21 | 7 |
| --- | --- | --- |
| 7 | 0.181 | - |
| control | 0.027 | 0.181 |

P value adjustment method: holm

> tapply(nsp33,day,summary)

> summary(aov(nsp33~day))

|  | Df | Sum Sq | Mean Sq | F value | Pr(>F) |  |
| --- | --- | --- | --- | --- | --- | --- |
| day | 2 | 73.79 | 36.9 | 6.343 | 0.00736 | ** |
| Residuals | 20 | 116.33 | 5.82 | ---- |  |  |

Signif. codes: 0 ‘***’ 0.001 ‘**’ 0.01 ‘*’ 0.05 ‘.’ 0.1 ‘ ’ 1

> pairwise.t.test(nsp33,day)

Pairwise comparisons using t tests with pooled SD

data: nsp33 and day

|  | 21 | 7 |
| --- | --- | --- |
| 7 | 0.032 | - |
| control | 0.015 | 0.187 |

P value adjustment method: holm

**########## linear and linear mixed models for NSP antibodies ##############**

> ns<-read.csv("nsp.csv",sep=';')

> ns$vac<-factor(substr(ns$vactype,1,4))

> attach(ns)

> summary(ns)

> tapply(percinh,animal,length)

> h0<-lmer(percinh~(1|animal))

boundary (singular) fit: see ?isSingular

> h1<-lmer(percinh~factor(dpv)+(1|animal))

boundary (singular) fit: see ?isSingular

> h2<-lmer(percinh~vactype+(1|animal))

boundary (singular) fit: see ?isSingular

> h2a<-lmer(percinh~vac+(1|animal))

boundary (singular) fit: see ?isSingular

> h3<-lmer(percinh~prot+(1|animal))

boundary (singular) fit: see ?isSingular

> h4<-lmer(percinh~factor(dpc)+(1|animal))

> AIC(h0,h1,h2,h2a,h3,h4)

|  | df | AIC |
| --- | --- | --- |
| h0 | 3 | 1491.296 |
| h1 | 5 | 1484.43 |
| h2 | 7 | 1475.986 |
| h2a | 5 | 1484.822 |
| h3 | 4 | 1487.966 |
| h4 | 9 | 1025.289 |

> summary(h4) #I do not understand the singularity we have 7 observations per animal. but we ignore it as model h4 does not give this warning

Linear mixed model fit by REML ['lmerMod']

Formula: percinh ~ factor(dpc) + (1 | animal)

REML criterion at convergence: 1007.3

Scaled residuals:

| Min | 1Q | Median | 3Q | Max |
| --- | --- | --- | --- | --- |
| -3.00231 | -0.54037 | 0.04811 | 0.53723 | 2.8935 |

Random effects:

| Groups | Name | Variance | Std.Dev. |
| --- | --- | --- | --- |
| animal | (Intercept) | 18.01 | 4.244 |
| Residual |  | 27.52 | 5.246 |

Number of obs: 161, groups: animal, 23

Fixed effects:

|  | Estimate | Std. Error | t value |
| --- | --- | --- | --- |
| (Intercept) | 33.364 | 1.407 | 23.714 |
| factor(dpc)5 | 7.407 | 1.547 | 4.789 |
| factor(dpc)11 | 54.06 | 1.547 | 34.949 |
| factor(dpc)14 | 55.002 | 1.547 | 35.558 |
| factor(dpc)21 | 54.674 | 1.547 | 35.345 |
| factor(dpc)28 | 56.854 | 1.547 | 36.755 |
| factor(dpc)33 | 59.007 | 1.547 | 38.147 |

Correlation of Fixed Effects:

|  | (Intr) | fct()5 | fc()11 | fc()14 | fc()21 | fc()28 |
| --- | --- | --- | --- | --- | --- | --- |
| factr(dpc)5 | -0.55 |  |  |  |  |  |
| fctr(dpc)11 | -0.55 | 0.50 |  |  |  |  |
| fctr(dpc)14 | -0.55 | 0.50 | 0.50 |  |  |  |
| fctr(dpc)21 | -0.55 | 0.50 | 0.50 | 0.50 |  |  |
| fctr(dpc)28 | -0.55 | 0.50 | 0.50 | 0.50 | 0.50 |  |
| fctr(dpc)33 | -0.55 | 0.50 | 0.50 | 0.50 | 0.50 | 0.50 |

> h5<-lmer(percinh~factor(dpc)+factor(dpv)+(1|animal))

> h6<-lmer(percinh~factor(dpc)+vactype+(1|animal))

> h6a<-lmer(percinh~factor(dpc)+vac+(1|animal))

> h7<-lmer(percinh~factor(dpc)+prot+(1|animal))

> AIC(h4,h5,h6,h6a,h7)

|  | df | AIC |
| --- | --- | --- |
| h4 | 9 | 1025.289 |
| h5 | 11 | 1018.709 |
| h6 | 13 | 1006.9 |
| h6a | 11 | 1020.319 |
| h7 | 10 | 1021.786 |

> summary(h6)

Linear mixed model fit by REML ['lmerMod']

Formula: percinh ~ factor(dpc) + vactype + (1 | animal)

REML criterion at convergence: 980.9

Scaled residuals:

| Min | 1Q | Median | 3Q | Max |
| --- | --- | --- | --- | --- |
| -3.01572 | -0.52373 | 0.04974 | 0.50303 | 2.88008 |

Random effects:

| Groups | Name | Variance | Std.Dev. |
| --- | --- | --- | --- |
| animal | (Intercept) | 10.87 | 3.297 |
| Residual |  | 27.52 | 5.246 |

Number of obs: 161, groups: animal, 23

Fixed effects:

|  | Estimate | Std. Error | t value |
| --- | --- | --- | --- |
| (Intercept) | 32.826 | 1.997 | 16.442 |
| factor(dpc)5 | 7.407 | 1.547 | 4.789 |
| factor(dpc)11 | 54.06 | 1.547 | 34.949 |
| factor(dpc)14 | 55.002 | 1.547 | 35.558 |
| factor(dpc)21 | 54.674 | 1.547 | 35.345 |
| factor(dpc)28 | 56.854 | 1.547 | 36.755 |
| factor(dpc)33 | 59.007 | 1.547 | 38.147 |
| vactypecomb7 | -1.629 | 2.433 | -0.669 |
| vactypecontr | 2.662 | 2.81 | 0.947 |
| vactypeO303921 | -2.904 | 2.433 | -1.193 |
| vactypeO30397 | 5.408 | 2.433 | 2.222 |

Correlation of Fixed Effects:

|  | (Intr) | fct()5 | fc()11 | fc()14 | fc()21 | fc()28 | fc()33 | vctyp7 | vctypc | vO303921 |
| --- | --- | --- | --- | --- | --- | --- | --- | --- | --- | --- |
| factr(dpc)5 | -0.387 |  |  |  |  |  |  |  |  |  |
| fctr(dpc)11 | -0.387 | 0.500 |  |  |  |  |  |  |  |  |
| fctr(dpc)14 | -0.387 | 0.500 | 0.500 |  |  |  |  |  |  |  |
| fctr(dpc)21 | -0.387 | 0.500 | 0.500 | 0.500 |  |  |  |  |  |  |
| fctr(dpc)28 | -0.387 | 0.500 | 0.500 | 0.500 | 0.500 |  |  |  |  |  |
| fctr(dpc)33 | -0.387 | 0.500 | 0.500 | 0.500 | 0.500 | 0.500 |  |  |  |  |
| vactypecmb7 | -0.609 | 0.000 | 0.000 | 0.000 | 0.000 | 0.000 | 0.000 |  |  |  |
| vactypecntr | -0.528 | 0.000 | 0.000 | 0.000 | 0.000 | 0.000 | 0.000 | 0.433 |  |  |
| vctyO303921 | -0.609 | 0.000 | 0.000 | 0.000 | 0.000 | 0.000 | 0.000 | 0.500 | 0.433 |  |
| vctypO30397 | -0.609 | 0.000 | 0.000 | 0.000 | 0.000 | 0.000 | 0.000 | 0.500 | 0.433 | 0.500 |

> h8<-lmer(percinh~factor(dpc)+vactype+factor(dpv)+(1|animal)) #nonsense I know dpv is part of vactype

fixed-effect model matrix is rank deficient so dropping 2 columns / coefficients

> h9<-lmer(percinh~factor(dpc)+vactype+vactype:factor(dpc)+(1|animal))

> h10<-lmer(percinh~factor(dpc)+vactype+prot+(1|animal))

> h11<-lmer(percinh~factor(dpc)+vactype+vac+(1|animal)) #nonsense I know vac is part of vactype

fixed-effect model matrix is rank deficient so dropping 2 columns / coefficients

> AIC(h6,h8,h9,h10,h11)

|  | df | AIC |
| --- | --- | --- |
| h6 | 13 | 1006.9004 |
| h8 | 13 | 1006.9004 |
| h9 | 37 | 906.5031 |
| h10 | 14 | 1005.0319 |
| h11 | 13 | 1006.9004 |

> h11<-lmer(percinh~factor(dpc)+vactype+vactype:factor(dpc)+factor(dpv)+(1|animal))

fixed-effect model matrix is rank deficient so dropping 2 columns / coefficients

> h12<-lmer(percinh~factor(dpc)+vactype+vactype:factor(dpc)+prot+(1|animal))

> h13<-lmer(percinh~factor(dpc)+vactype+vactype:factor(dpc)+vac+(1|animal))

fixed-effect model matrix is rank deficient so dropping 2 columns / coefficients

> AIC(h9,h11,h12,h13)

|  | df | AIC |
| --- | --- | --- |
| h9 | 37 | 906.5031 |
| h11 | 37 | 906.5031 |
| h12 | 38 | 904.6345 |
| h13 | 37 | 906.5031 |

> summary(h12) #difference in AIC less than 2 so not truly significant t-value also low.

Linear mixed model fit by REML ['lmerMod']

Formula: percinh ~ factor(dpc) + vactype + vactype:factor(dpc) + prot + (1 | animal)

REML criterion at convergence: 828.6

Scaled residuals:

| Min | 1Q | Median | 3Q | Max |
| --- | --- | --- | --- | --- |
| -2.42664 | -0.43492 | 0.02643 | 0.39563 | 2.32534 |

Random effects:

| Groups | Name | Variance | Std.Dev. |
| --- | --- | --- | --- |
| animal | (Intercept) | 12.39 | 3.52 |
| Residual |  | 23 | 4.796 |

Number of obs: 161, groups: animal, 23

Fixed effects:

|  | Estimate | Std. Error | t value |
| --- | --- | --- | --- |
| (Intercept) | 30.77792 | 3.86199 | 7.969 |
| factor(dpc)5 | 6.68253 | 3.03327 | 2.203 |
| factor(dpc)11 | 56.95039 | 3.03327 | 18.775 |
| factor(dpc)14 | 59.21074 | 3.03327 | 19.520 |
| factor(dpc)21 | 57.81267 | 3.03327 | 19.060 |
| factor(dpc)28 | 59.58922 | 3.03327 | 19.645 |
| factor(dpc)33 | 61.58045 | 3.03327 | 20.302 |
| vactypecomb7 | 5.15046 | 3.80387 | 1.354 |
| vactypecontr | -1.13330 | 5.16832 | -0.219 |
| vactypeO303921 | -1.50405 | 3.76244 | -0.400 |
| vactypeO30397 | 9.16337 | 3.92554 | 2.334 |
| prot | -0.06873 | 2.79947 | -0.025 |
| factor(dpc)5:vactypecomb7 | 0.32366 | 4.28969 | 0.075 |
| factor(dpc)11:vactypecomb7 | -11.56549 | 4.28969 | -2.696 |
| factor(dpc)14:vactypecomb7 | -14.58997 | 4.28969 | -3.401 |
| factor(dpc)21:vactypecomb7 | -9.90166 | 4.28969 | -2.308 |
| factor(dpc)28:vactypecomb7 | -6.92225 | 4.28969 | -1.614 |
| factor(dpc)33:vactypecomb7 | -4.89406 | 4.28969 | -1.141 |
| factor(dpc)5:vactypecontr | -0.48700 | 4.95331 | -0.098 |
| factor(dpc)11:vactypecontr | 6.03826 | 4.95331 | 1.219 |
| factor(dpc)14:vactypecontr | 4.89898 | 4.95331 | 0.989 |
| factor(dpc)21:vactypecontr | 5.74188 | 4.95331 | 1.159 |
| factor(dpc)28:vactypecontr | 5.62888 | 4.95331 | 1.136 |
| factor(dpc)33:vactypecontr | 4.26504 | 4.95331 | 0.861 |
| factor(dpc)5:vactypeO303921 | 0.33317 | 4.28969 | 0.078 |
| factor(dpc)11:vactypeO303921 | -0.79749 | 4.28969 | -0.186 |
| factor(dpc)14:vactypeO303921 | -1.84073 | 4.28969 | -0.429 |
| factor(dpc)21:vactypeO303921 | -2.78002 | 4.28969 | -0.648 |
| factor(dpc)28:vactypeO303921 | -2.60884 | 4.28969 | -0.608 |
| factor(dpc)33:vactypeO303921 | -2.10534 | 4.28969 | -0.491 |
| factor(dpc)5:vactypeO30397 | 2.97001 | 4.28969 | 0.692 |
| factor(dpc)11:vactypeO30397 | -4.55577 | 4.28969 | -1.062 |
| factor(dpc)14:vactypeO30397 | -5.86707 | 4.28969 | -1.368 |
| factor(dpc)21:vactypeO30397 | -5.20289 | 4.28969 | -1.213 |
| factor(dpc)28:vactypeO30397 | -6.42695 | 4.28969 | -1.498 |
| factor(dpc)33:vactypeO30397 | -7.39724 | 4.28969 | -1.724 |

Correlation matrix not shown by default, as p = 36 > 12.

Use print(x, correlation=TRUE) or vcov(x) if you need it

> summary(h9) #The model indicates a lower percinh in comb7 than in comb21 especially on day 11, 14 and 21

Linear mixed model fit by REML ['lmerMod']

Formula: percinh ~ factor(dpc) + vactype + vactype:factor(dpc) + (1 | animal)

REML criterion at convergence: 832.5

Scaled residuals:

| Min | 1Q | Median | 3Q | Max |
| --- | --- | --- | --- | --- |
| -2.43159 | -0.44916 | 0.02033 | 0.39049 | 2.33132 |

Random effects:

| Groups | Name | Variance | Std.Dev. |
| --- | --- | --- | --- |
| animal | (Intercept) | 11.52 | 3.394 |
| Residual |  | 23.00 | 4.796 |

Number of obs: 161, groups: animal, 23

Fixed effects:

|  | Estimate | Std. Error | t value |
| --- | --- | --- | --- |
| (Intercept) | 30.7092 | 2.6275 | 11.687 |
| factor(dpc)5 | 6.6825 | 3.0333 | 2.203 |
| factor(dpc)11 | 56.9504 | 3.0333 | 18.775 |
| factor(dpc)14 | 59.2107 | 3.0333 | 19.52 |
| factor(dpc)21 | 57.8127 | 3.0333 | 19.06 |
| factor(dpc)28 | 59.5892 | 3.0333 | 19.645 |
| factor(dpc)33 | 61.5805 | 3.0333 | 20.302 |
| vactypecomb7 | 5.1642 | 3.7159 | 1.39 |
| vactypecontr | -1.0646 | 4.2907 | -0.248 |
| vactypeO303921 | -1.5040 | 3.7159 | -0.405 |
| vactypeO30397 | 9.1909 | 3.7159 | 2.473 |
| factor(dpc)5:vactypecomb7 | 0.3237 | 4.2897 | 0.075 |
| factor(dpc)11:vactypecomb7 | -11.5655 | 4.2897 | -2.696 |
| factor(dpc)14:vactypecomb7 | -14.5900 | 4.2897 | -3.401 |
| factor(dpc)21:vactypecomb7 | -9.9017 | 4.2897 | -2.308 |
| factor(dpc)28:vactypecomb7 | -6.9222 | 4.2897 | -1.614 |
| factor(dpc)33:vactypecomb7 | -4.8941 | 4.2897 | -1.141 |
| factor(dpc)5:vactypecontr | -0.4870 | 4.9533 | -0.098 |
| factor(dpc)11:vactypecontr | 6.0383 | 4.9533 | 1.219 |
| factor(dpc)14:vactypecontr | 4.8990 | 4.9533 | 0.989 |
| factor(dpc)21:vactypecontr | 5.7419 | 4.9533 | 1.159 |
| factor(dpc)28:vactypecontr | 5.6289 | 4.9533 | 1.136 |
| factor(dpc)33:vactypecontr | 4.2650 | 4.9533 | 0.861 |
| factor(dpc)5:vactypeO303921 | 0.3332 | 4.2897 | 0.078 |
| factor(dpc)11:vactypeO303921 | -0.7975 | 4.2897 | -0.186 |
| factor(dpc)14:vactypeO303921 | -1.8407 | 4.2897 | -0.429 |
| factor(dpc)21:vactypeO303921 | -2.7800 | 4.2897 | -0.648 |
| factor(dpc)28:vactypeO303921 | -2.6088 | 4.2897 | -0.608 |
| factor(dpc)33:vactypeO303921 | -2.1053 | 4.2897 | -0.491 |
| factor(dpc)5:vactypeO30397 | 2.9700 | 4.2897 | 0.692 |
| factor(dpc)11:vactypeO30397 | -4.5558 | 4.2897 | -1.062 |
| factor(dpc)14:vactypeO30397 | -5.8671 | 4.2897 | -1.368 |
| factor(dpc)21:vactypeO30397 | -5.2029 | 4.2897 | -1.213 |
| factor(dpc)28:vactypeO30397 | -6.4269 | 4.2897 | -1.498 |
| factor(dpc)33:vactypeO30397 | -7.3972 | 4.2897 | -1.724 |

Correlation matrix not shown by default, as p = 35 > 12.

Use print(x, correlation=TRUE) or vcov(x) if you need it

> detach(ns)
